# Supplementary material
Source: ML conference proceedings conference paper supplement (https://aclanthology.org/D11-1054)
Supplement: Attachment [file phrase_fisher10k.xlsx]

## Sheet: Sheet1
0	birthday	happy	2458	4223	600
0	rt	thanks for	15729	5033	1191
0	rt	for the	15729	8195	1430
0	rt	thanks for the	15729	3077	955
0	potter	harry	1278	557	185
0	how are	you -question-	1760	4875	372
0	harry	potter	1391	458	175
2.233E-321	ice	cream	1333	682	184
2.0758593E-317	cream	ice	1005	865	181
9.8530965E-315	how are you	you -question-	1261	4875	289
3.0283168415907E-309	good	morning	19578	3181	659
6.523252207582211E-295	how are	good	1760	23545	528
1.470073719354007E-282	i miss	miss you	1739	1424	211
6.390577890109768E-273	wish me	luck	339	2391	155
1.291312019265432E-269	chuck	norris	339	126	91
5.77979040242715E-261	norris	chuck	208	236	92
5.822234843108751E-254	watching	movie	6587	2827	363
2.0085329571670033E-249	are you	you -question-	6415	4875	441
1.2121583680869676E-248	i miss	miss you too	1739	253	127
4.349184499563206E-247	morning	good	6106	23545	904
3.5362977808348257E-246	i love	love you	6643	2269	329
1.5163859933039886E-232	wish me	good luck	339	1950	132
4.129705279995729E-231	how are	m good	1760	515	142
1.2431951631652521E-230	are you	i 'm	6415	26421	962
3.957905060876907E-230	are you	m	6415	26562	964
4.0783491618183784E-229	my birthday	happy birthday	498	1008	125
2.636821069587329E-227	happy	birthday	4650	1956	263
4.0209151535540947E-227	how are	i 'm good	1760	513	140
1.022903105006206E-225	me luck	good luck	317	1950	127
2.8272059094422045E-224	how are	m	1760	26562	479
2.806233849596641E-223	wish me luck	good luck	307	1950	125
9.385225379695475E-221	how are	i 'm	1760	26421	474
2.8386326765565923E-218	my birthday	happy	498	4223	164
7.822375163757782E-216	i love	love you too	6643	308	157
3.021538333148663E-212	how was	it was	753	5694	196
6.934322086298796E-206	miss	you too	3533	1314	199
3.9756306389849504E-204	how are you	good	1261	23545	371
1.308131722332828E-192	miss you	i miss	628	2031	134
1.1437104677478191E-191	swine	flu	476	373	89
5.946700941842345E-191	love you	you too	1453	1314	148
4.201185305569105E-190	i love you	love you too	872	308	95
3.941069466444052E-183	how are	are you -question-	1760	1450	155
7.091055402731197E-183	how are you	m	1261	26562	367
9.437900609718953E-182	how are you	i 'm	1261	26421	365
7.76943661145985E-179	did you	i did	2913	3269	229
9.443263336538484E-175	jackson	michael	1708	679	122
3.1912374128003575E-173	michael	jackson	1876	468	113
5.847700080187858E-171	how are you	m good	1261	515	105
4.785610141681849E-169	how are you	i 'm good	1261	513	104
5.569025299727639E-161	i miss	you too	1739	1314	137
2.0365026752308763E-160	i miss you	miss you too	378	253	69
4.191141370521621E-159	love	you too	14432	1314	271
4.927102843963709E-159	flu	swine	609	284	76
1.6794098734042405E-156	love you	i love	1453	7608	220
2.271486308023275E-155	rt	retweet	15729	305	155
2.1647638027099713E-152	michael	mj	1876	665	112
1.0189148537304242E-150	how are you	are you -question-	1261	1450	123
2.8724240445777213E-149	miss you	you too	628	1314	100
4.003379440447044E-149	bed	night	3393	5138	257
3.4781525197013864E-148	watching	that movie	6587	724	158
8.676614529270945E-141	how are	fine	1760	1640	133
1.9968520778705651E-140	jackson	mj	1708	665	103
2.7166064539283996E-136	michael jackson	mj	1278	665	94
5.673172040625739E-136	i love you	you too	872	1314	101
5.82902846976814E-135	how are	im good	1760	303	83
7.215345627195365E-134	birthday to	happy birthday	222	1008	69
1.3449610772642463E-133	to bed	night	1515	5138	176
2.2550432068433943E-133	good morning	morning to	1811	178	73
2.261496098686E-133	smiles *	* smiles	304	303	59
2.2103307611539249E-131	follow	thanks for	3580	5033	242
6.986685298212043E-130	my hair	your hair	876	282	69
3.290344174917135E-129	good morning	morning to you	1811	146	68
7.226054355567686E-129	bed	sleep	3393	2934	189
8.468899831280272E-129	-exclam- how	you -question-	1398	4875	164
6.668510656124292E-128	you -question-	i 'm	3094	26421	492
1.2051989547467473E-127	you -question-	m	3094	26562	493
2.342650232833799E-127	good morning	morning -exclam-	1811	451	88
4.0034641349654885E-126	are you	i am	6415	6586	350
1.1429308410547192E-125	how are	are you	1760	12009	250
1.1114845030702517E-124	i love	you too	6643	1314	175
2.2810743270663576E-124	sick	feel better	1698	723	96
5.819088674251698E-124	how are you -question-	good	563	23545	196
6.90212331259214E-123	* smiles	smiles *	282	321	55
2.2863854996352765E-122	birthday to	happy	222	4223	86
9.569597996319059E-122	-exclam- how	how are	1398	2363	125
2.938260648744804E-121	are you -question-	i 'm	946	26421	257
9.757342841264305E-121	are you -question-	m	946	26562	257
1.1026658645206746E-120	followers	i lost	2219	220	74
2.8381587122010515E-120	true	blood	1856	500	87
4.810947194250428E-120	-exclam- how	how are you	1398	1793	114
1.142796774874173E-119	follow	for the	3580	8195	285
3.515106164876263E-119	rt	the retweet	15729	100	86
5.75400769855061E-119	follow	thanks for the	3580	3077	187
6.187520349396104E-119	are you	how are	6415	2363	212
3.30090911303612E-116	you -question-	i 'm good	3094	513	97
3.982509428713868E-116	iphone	app	2666	590	97
4.961884499236698E-116	you -question-	m good	3094	515	97
5.181397186321242E-116	topic	trending	730	415	66
2.5006225790133308E-115	iphone	3gs	2666	184	71
7.648976345891805E-115	rt	for the retweet	15729	94	82
3.070379623536695E-113	: rt	the rt	549	1019	74
6.036997650676417E-112	birthday	bday	2458	557	91
1.0977811074308777E-111	i miss you	you too	378	1314	71
1.6823290985991597E-111	i miss	miss you too -exclam-	1739	85	53
3.857005275766739E-111	bday	birthday	705	1956	91
4.544645775909717E-111	: rt	for the rt	549	964	72
2.83325433380197E-110	how are	im	1760	11584	229
6.418260504805564E-110	blog	post	2142	1562	117
8.804372431384155E-110	new blog post	blog post :	387	37	35
1.5239881331781262E-108	of july	4th	419	494	58
1.5248602052543142E-108	how are	u -question-	1760	1507	108
4.19178939257981E-108	how are	. how	1760	1763	113
3.009245971452968E-107	bday	happy	705	4223	110
3.0857753795567705E-107	goodnight	good night	736	587	67
4.529819121871997E-107	july	4th	1219	494	72
1.5151146166327333E-106	birthday -exclam-	happy birthday	269	1008	60
1.673368682542898E-106	are you	m good	6415	515	112
1.6865563733011069E-106	how are you	fine	1261	1640	99
2.7478165124177556E-106	morning	day	6106	7913	345
3.7867157371340243E-106	bed	dreams	3393	549	95
2.6593316147107148E-105	are you	i 'm good	6415	513	111
3.2670531053207334E-105	post	blog	2014	1212	103
3.301513093603648E-105	followers	lost	2219	1138	104
5.081822672985959E-105	new blog	blog post	535	150	47
1.152765367534313E-104	new blog	blog post :	535	37	35
1.4472924162325825E-104	how are you -question-	i 'm	563	26421	186
3.55351226470878E-104	how are you -question-	m	563	26562	186
1.8348253848135735E-103	trending	topic	927	433	64
2.9366164427510444E-103	-exclam- how	good	1398	23545	273
6.45268303188598E-103	birthday -exclam-	happy	269	4223	80
3.5556154009016607E-102	wish me	good	339	23545	141
2.534006092138989E-101	new blog post	post :	387	48	35
8.264775286672915E-101	me luck	good	317	23545	136
2.383493987980382E-100	facebook	fb	1564	451	71
3.669729422686085E-100	morning	how are	6106	2363	188
5.181937876558641E-100	rt	thank you for the	15729	383	128
7.570392409446247E-100	-exclam- how are	you -question-	354	4875	88
1.0282492736428828E-99	new blog	post :	535	48	36
2.6421238011733815E-99	wish me luck	good	307	23545	133
3.0775953889817892E-99	blog post	post :	551	48	36
8.998589676130953E-99	post :	blog post	423	150	43
5.38457198496149E-98	interview	good luck	870	1950	88
9.521693878076696E-98	rt	you for the	15729	413	130
1.2365971108155493E-97	interview	luck	870	2391	93
9.041918866245193E-97	bell	taco	283	183	41
1.483579534789115E-96	hair	cut	2306	709	86
1.508469646800599E-96	-exclam- how are	how are you	354	1793	67
2.516031430766997E-96	rt	thank you for	15729	805	170
3.757419621651369E-96	the birthday	happy birthday	102	1008	45
1.1142976311228638E-94	how r	good	352	23545	137
2.76405645080386E-94	: rt	for the	549	8195	114
2.87889596092974E-94	tomorrow	luck	5757	2391	178
3.7784424495236635E-94	hey	you -question-	5300	4875	237
6.044376808928906E-94	star	trek	723	104	42
9.865299212040697E-94	noite	boa	45	87	27
2.284764615110918E-93	was it	it was	442	5694	94
2.9012240430660445E-93	how was	was good	753	385	55
3.2703217444781886E-93	how are you	. how	1261	1763	92
3.3178778553393233E-93	how are you -question-	i 'm good	563	513	55
3.7522436500078755E-93	how are	i 'm great	1760	91	47
3.7522436500078755E-93	how are	m great	1760	91	47
4.152543028014757E-93	how are you -question-	m good	563	515	55
4.1801970266687175E-93	vote for	voted	276	145	38
2.9461903429284087E-92	. wish me	luck	105	2391	51
6.754871796855141E-92	ko	ka	339	569	50
7.06216748329226E-92	is it	it 's	3337	14847	325
3.7259747635115505E-91	bed	good night	3393	587	87
3.817297821289239E-91	taco	bell	318	141	38
5.96033419835867E-91	how are you	im good	1261	303	57
8.818906438138064E-90	are you -question-	good	946	23545	209
1.3406206873764284E-89	watching	that show	6587	383	91
1.358444238601412E-89	how are	m fine	1760	135	50
1.358444238601412E-89	how are	i 'm fine	1760	135	50
3.370326145411575E-89	the birthday	happy	102	4223	55
4.255186403878571E-89	blood	true	892	2225	86
4.704471160327265E-89	watch	movie	4450	2827	166
6.341849185628331E-89	are you -question-	how are	946	2363	89
9.261745050557189E-89	are you -question-	how are you	946	1793	82
9.523257624978168E-89	how r	i 'm good	352	513	48
1.1571984293529667E-88	how r	m good	352	515	48
1.8183995867585146E-88	-exclam- how	how are you -question-	1398	846	74
2.2171305956505243E-88	rt	thank you	15729	3346	330
3.585028715515623E-88	tomorrow	good luck	5757	1950	157
3.946967152347539E-88	bed	sweet dreams	3393	245	66
9.463306512640583E-88	new blog	post	535	1562	67
1.1534068760013204E-87	how are	and you -question-	1760	186	53
1.517342835726515E-87	to bed	good night	1515	587	68
1.7749561760562456E-87	: rt	thanks for	549	5033	93
2.2747803813893313E-87	a trending	trending topic	371	227	41
3.50750992356322E-87	laughs *	* laughs	177	225	36
5.571254095748183E-87	off to	have fun	2362	2044	113
6.830359994021642E-87	night	dreams	7719	549	106
7.153387281610014E-87	post :	blog	423	1212	59
9.428200653029572E-87	good	morning to	19578	178	93
1.1300575649332251E-86	you -question-	good	3094	23545	392
3.920365263335317E-86	wish me luck -exclam-	good luck	119	1950	48
4.116462331752447E-86	to bed	dreams	1515	549	66
1.0315675866869792E-85	my birthday	birthday -exclam-	498	375	47
1.0760938242722914E-85	me luck -exclam-	good luck	121	1950	48
1.7025355644179327E-85	blog post :	new blog post	325	35	28
5.714401314852905E-85	good	morning to you	19578	146	85
6.644749350257872E-85	s my birthday	happy birthday	65	1008	37
1.9727520341456278E-84	how was	yours -question-	753	295	48
2.0516597887582642E-84	how are	great	1760	7545	164
2.923653770014909E-84	are you -question-	i 'm good	946	513	57
3.686445580495069E-84	are you -question-	m good	946	515	57
4.4433025207601875E-84	it 's my	birthday	243	1956	56
5.171022336916716E-84	feeling	feel better	2382	723	79
2.644729397868617E-83	bday	happy birthday	705	1008	62
5.12235905154001E-83	trek	star	205	455	40
6.43692413616087E-83	ra :	# ra	17	18	17
1.2295850531382555E-82	it 's my	happy birthday	243	1008	48
1.498663618667095E-82	sick	feel	1698	4291	127
2.2627799433661602E-82	it 's my birthday	happy birthday	64	1008	36
3.619175208479055E-82	post :	new blog post	423	35	28
4.3831483179641506E-82	luck -exclam-	good luck	244	1950	55
4.779109961772482E-82	morning ,	good morning	428	985	54
8.067106507923202E-82	how r u	good	297	23545	117
9.533223630390233E-82	* laughs	laughs *	172	227	34
1.114647197726338E-81	how are	good thanks	1760	141	47
1.6381315861109708E-81	today -question-	you -question-	1560	4875	128
3.5071570042969904E-81	rt	thanks for the retweet	15729	67	58
1.2696799196164301E-80	: rt	thanks for the	549	3077	76
1.4220273787323653E-80	blog	post :	2142	48	37
1.5192689924039876E-80	butter	peanut	293	145	34
1.620249548178385E-80	i miss	miss u	1739	355	58
1.672880078233289E-80	good morning	to you	1811	2301	102
6.133871215925543E-80	-exclam- how are	how are you -question-	354	846	49
1.1598528585360403E-79	friday	follow	2501	2826	123
1.5684834554573242E-79	thanks for	no problem	1663	311	55
1.7056027634298738E-79	-exclam- how	are you -question-	1398	1450	80
2.3464566635977832E-79	how 's	good	850	23545	186
3.845792724656688E-79	sleep	night	4135	5138	197
4.2852183964010274E-79	peanut	butter	221	208	34
7.125106557602217E-79	followers	spam	2219	301	58
7.32283553611862E-79	miss	you too -exclam-	3533	368	69
9.128510558289808E-79	it 's my	happy	243	4223	64
1.018823825417637E-78	rt	you for	15729	1204	183
1.2834098165914427E-78	follow friday	thanks for	485	5033	83
1.4170058573223592E-78	hey	how are	5300	2363	154
2.1545088159298734E-78	thank you	you 're welcome	2068	266	55
2.5549820638486606E-78	-exclam- how are you	you -question-	254	4875	67
3.4022490753408854E-78	good morning	how are	1811	2363	101
4.247950079139677E-78	thank you	re welcome	2068	269	55
5.077996765712754E-78	how are you	. how are	1261	340	52
7.337293155563914E-78	to bed	sleep	1515	2934	102
7.429204005456251E-78	wan	na	4261	9691	274
9.012142217040639E-78	how are you	i 'm fine	1261	135	42
9.012142217040639E-78	how are you	m fine	1261	135	42
1.0901059486272192E-77	blog post	new blog	551	71	32
1.641047381045474E-77	watching	show	6587	3621	206
2.253473652014669E-77	a trending	topic	371	433	42
2.46866363382178E-77	sarah	palin	357	87	31
3.948388027589322E-77	love	too -exclam-	14432	3764	317
5.471972618052003E-77	birthday to me	happy birthday	63	1008	34
7.784515138916615E-77	how are you	good thanks	1261	141	42
1.7254641933682956E-76	fox	megan	387	195	36
2.5816308401733367E-76	follow friday	for the	485	8195	95
3.455810359848649E-76	: rt	thanks for the rt	549	701	50
6.637092549748077E-76	hey	m good	5300	515	84
8.658625281685456E-76	. wish	luck	240	2391	54
8.903609718283956E-76	s my birthday	happy	65	4223	43
9.701051353264079E-76	is it	it is	3337	3925	154
1.084572674450788E-75	follow friday	thanks for the	485	3077	70
1.0861774705241965E-75	morning	how are you	6106	1793	142
2.3882609597606056E-75	. wish me	good luck	105	1950	42
4.868636684855885E-75	blackberry	iphone	689	1400	62
4.919112346629549E-75	off to	fun	2362	5799	156
5.758641621198429E-75	billy	mays	334	60	28
5.863870921857543E-75	r u	m	1250	26562	234
9.652632253306631E-75	watched	movie	1111	2827	88
1.0205967570033977E-74	hey	i 'm good	5300	513	83
1.0459297525933947E-74	followfriday	for the	174	8195	66
1.5671940186585234E-74	, how	good	1065	23545	202
1.62131332263519E-74	are you	im	6415	11584	377
2.6137252353749698E-74	na	wan	10219	3875	262
3.765593994055306E-74	i miss	you too -exclam-	1739	368	55
4.031888563536882E-74	listening	song	2333	3054	118
5.1297658596438235E-74	r u	i 'm	1250	26421	232
7.23664072817279E-74	how r u	i 'm good	297	513	40
7.482896294399636E-74	morning -exclam-	good morning	741	985	57
8.192277917924448E-74	it 's my birthday	happy	64	4223	42
8.500814746173353E-74	how r u	m good	297	515	40
1.067907175977008E-73	. wish me luck	good luck	102	1950	41
3.073630262351342E-73	food	eat	2202	1956	97
4.1798421258748404E-73	follow	friday	3580	1583	107
6.11842090581245E-73	megan	fox	281	204	33
9.533275770397943E-73	ka	ko	312	519	40
9.618326002628062E-73	good morning	day	1811	7913	156
1.148414772702155E-72	blog post :	new blog	325	71	28
1.4707411138858666E-72	hungry	eat	1175	1956	78
1.835026943215322E-72	how are you	im	1261	11584	156
1.9311926163039549E-72	are you	fine	6415	1640	136
2.5323341573078264E-72	reading	book	1473	1268	73
3.5570543310906695E-72	iphone	3g	2666	135	46
3.627878367243982E-72	ra : wm decode	# ra	15	18	15
3.627878367243982E-72	wm decode	ra :	15	18	15
3.627878367243982E-72	ra : wm decode	# ra :	15	18	15
3.627878367243982E-72	: wm	ra :	15	18	15
3.627878367243982E-72	: wm	# ra :	15	18	15
3.627878367243982E-72	wm decode	# ra	15	18	15
3.627878367243982E-72	ra : wm	# ra	15	18	15
3.627878367243982E-72	: wm decode	ra :	15	18	15
3.627878367243982E-72	ra : wm	# ra :	15	18	15
3.627878367243982E-72	wm decode	# ra :	15	18	15
3.627878367243982E-72	: wm	# ra	15	18	15
3.627878367243982E-72	: wm decode	# ra	15	18	15
3.627878367243982E-72	: wm decode	# ra :	15	18	15
3.9855344530133355E-72	you -question-	good thanks	3094	141	48
6.406354151778122E-72	4th	happy	812	4223	88
7.47577307337617E-72	birthday to me	happy	63	4223	41
7.681808273153518E-72	thank you	welcome .	2068	170	46
1.5865426787633253E-71	u -question-	i 'm good	1092	513	52
1.9509566299257013E-71	how are you	m great	1261	91	36
1.9509566299257013E-71	how are you	i 'm great	1261	91	36
1.9564685414441547E-71	u -question-	m good	1092	515	52
2.4671364113999493E-71	been -question-	been good	352	107	30
2.9168197677335093E-71	lady	gaga	1037	139	38
3.784438691637686E-71	to bed	goodnight	1515	410	53
5.231834072568887E-71	off to bed	night	276	5138	65
5.414261702355472E-71	i miss you	miss you too -exclam-	378	85	29
5.521542169783615E-71	happy	4th	4650	494	76
1.0706509448576255E-70	birthday	happy bday	2458	141	45
1.3985037881849568E-70	how are you	great	1261	7545	128
1.587536897108265E-70	twitterberry	ubertwitter	86	142	25
1.8323920150363152E-70	bed	goodnight	3393	410	65
1.9883781411368355E-70	was your	it was	310	5694	69
2.8623624138420942E-70	me luck	luck -exclam-	317	454	38
3.517529894792988E-70	-exclam- how are	are you -question-	354	1450	50
4.933866858678195E-70	decode	# ra	17	18	15
4.933866858678195E-70	decode	# ra :	17	18	15
4.933866858678195E-70	decode	ra :	17	18	15
6.555299472636668E-70	to bed	sweet dreams	1515	245	46
7.677378894774916E-70	happy birthday	thank you	755	3346	78
8.718688593215079E-70	u -question-	im	1092	11584	143
9.917510288663194E-70	night	sleep	7719	2934	190
1.1730411474241492E-69	book	read	1502	2391	88
1.1749287955438944E-69	wish me	good luck -exclam-	339	384	37
2.4269827656265237E-69	post :	new blog	423	71	28
2.585392403342616E-69	wm decode	# ra : wm	15	14	14
2.585392403342616E-69	wm decode	: wm	15	14	14
2.585392403342616E-69	: wm decode	# ra : wm	15	14	14
2.585392403342616E-69	ra : wm decode	# ra : wm	15	14	14
2.585392403342616E-69	wm decode	ra : wm	15	14	14
2.585392403342616E-69	: wm decode	ra : wm	15	14	14
5.576285444249132E-69	wish me luck	good luck -exclam-	307	384	36
5.746462080873306E-69	followfriday	thanks for the	174	3077	49
9.878435018456526E-69	you -question-	im good	3094	303	57
1.4061384528659148E-68	wm	# ra :	19	18	15
1.4061384528659148E-68	wm	ra :	19	18	15
1.4061384528659148E-68	wm	# ra	19	18	15
1.461940974908157E-68	green	iran	998	129	36
1.5508553032982712E-68	morning	to you	6106	2301	150
1.88544698447518E-68	me luck	good luck -exclam-	317	384	36
3.170091432954461E-68	birthday wishes	happy	66	4223	40
3.5222677878804954E-68	how are you -question-	fine	563	1640	57
3.722134640529137E-68	happy	thank you	4650	3346	157
6.168237875157662E-68	read	book	2167	1268	79
1.1720445572850756E-67	decode	: wm	17	14	14
1.1720445572850756E-67	ra :	: wm	17	14	14
1.1720445572850756E-67	decode	# ra : wm	17	14	14
1.1720445572850756E-67	decode	ra : wm	17	14	14
1.2707955513309413E-67	how are you	u -question-	1261	1507	70
2.0201514826839635E-67	how are	fine thanks	1760	59	33
2.159232700470079E-67	how are you -question-	im good	563	303	38
2.219389964716524E-67	luck	good	1010	23545	187
2.541584123207E-67	how are	i 'm doing	1760	262	47
2.552171437065686E-67	sa	ko	420	519	40
3.0856867174429007E-67	how are	m doing	1760	263	47
3.553317839243738E-67	my mom	your mom	754	232	38
3.724962418091378E-67	i hate	you hate	2617	156	45
4.656115202583935E-67	followfriday	thanks for	174	5033	54
6.026306314681524E-67	chrome	google	150	686	34
6.075147258592517E-67	,	0	90351	108195	18689
7.393476356500198E-67	wish me	luck -exclam-	339	454	37
2.257334257667702E-66	of july	happy 4th	419	152	31
2.9296141671697124E-66	thanks for	you 're welcome	1663	266	46
2.9320723513732657E-66	wish me luck	luck -exclam-	307	454	36
3.2945260179964144E-66	did u	i did	926	3269	80
3.918196383359584E-66	u been	i been	363	335	35
4.731418194723626E-66	watching	movie -exclam-	6587	285	67
5.112196082583589E-66	thanks for	re welcome	1663	269	46
1.28970639058588E-65	how are	good ,	1760	778	62
1.45981881322428E-65	movie	watch	3290	3614	136
2.521294364993779E-65	ka	sa	312	542	37
4.142982126519159E-65	followers	spammers	2219	100	38
4.627563755186101E-65	are you	m fine	6415	135	52
4.627563755186101E-65	are you	i 'm fine	6415	135	52
5.459127679633502E-65	night	sweet dreams	7719	245	66
6.511147529636905E-65	my birthday	happy birthday -exclam-	498	265	35
9.199769060474606E-65	good morning	how are you	1811	1793	81
1.4854538533911113E-64	wishes	birthday	316	1956	49
1.6330331012334887E-64	sick	hope you feel better	1698	237	44
1.6912455321374975E-64	# followfriday	for the	128	8195	54
1.755971455208495E-64	you been	been good	479	107	29
2.9635650622023844E-64	topics	trending	330	415	35
3.047038511105766E-64	watching	watched	6587	929	101
4.0858631234358124E-64	( via	rt	978	4600	90
4.767358343751066E-64	rt	thx for	15729	257	83
5.036731117055678E-64	how was your	it was	209	5694	57
5.2808813236874114E-64	bed	sleep well	3393	182	48
6.485453483231759E-64	followers	twitter	2219	6397	145
1.1399416988721228E-63	been -question-	good	352	23545	109
1.1764167705812116E-63	sick	hope you feel	1698	247	44
1.2374842580582978E-63	-exclam- how are you	how are you -question-	254	846	38
1.3877758790896954E-63	rt	thx	15729	637	121
1.4517465061580447E-63	cut	hair	973	1515	62
1.710296285698552E-63	s my	happy birthday	786	1008	52
1.7137108732869288E-63	how r	im good	352	303	33
1.863603937485421E-63	. wish	good luck	240	1950	45
3.64074397892297E-63	4th of july	happy 4th	294	152	28
4.1976234251317175E-63	how was	it was good	753	174	34
4.598434633644099E-63	. how	good	1445	23545	220
5.330087465846004E-63	yet -question-	not yet	1008	311	41
6.420018342554703E-63	airport	flight	755	458	42
7.73858406746566E-63	you -exclam-	you too	2013	1314	74
8.805089249944098E-63	4th of	happy 4th	303	152	28
9.707623751834477E-63	google voice	invite	153	450	30
1.0451945156190397E-62	sick	you feel better	1698	308	46
1.4913045365116256E-62	s my	birthday	786	1956	62
1.747101312117551E-62	-exclam- how	m good	1398	515	50
1.8282107148348104E-62	july	happy 4th	1219	152	36
2.353990809942541E-62	cyrus	miley	167	284	28
2.375918875967716E-62	birthday wishes	happy birthday	66	1008	29
2.5490565503620545E-62	listening to	song	2113	3054	102
3.5941116906757817E-62	miss you	you too -exclam-	628	368	38
6.3469434078934264E-62	ka	ako	312	324	32
8.067307099201167E-62	post	new blog	2014	71	33
8.96763767741166E-62	friday	thanks for the	2501	3077	109
1.0614383747891285E-61	how r	i 'm	352	26421	112
1.0931697995225569E-61	airport	safe	755	982	50
1.5750111299671855E-61	trending topic	a trending	496	152	30
1.8160065376085166E-61	how r	m	352	26562	112
2.2258035571923734E-61	( via	the rt	978	1019	54
2.4004728033234672E-61	you -question-	m fine	3094	135	42
2.4004728033234672E-61	you -question-	i 'm fine	3094	135	42
2.457773624222804E-61	hows	good	479	23545	123
2.5097815407417444E-61	you been -question-	been good	144	107	23
3.410451537119904E-61	you -question-	how are you	3094	1793	95
4.137059538682144E-61	wm decode	ra	15	62	15
4.137059538682144E-61	: wm decode	ra	15	62	15
4.137059538682144E-61	: wm	ra	15	62	15
4.145853067233831E-61	( via	for the rt	978	964	53
4.708040655066383E-61	my birthday -exclam-	happy birthday	84	1008	30
5.256679433062548E-61	how was	good	753	23545	153
6.29706342214333E-61	my dad	your dad	534	148	30
6.62724427254972E-61	-exclam- how	i 'm good	1398	513	49
8.196920558696447E-61	are you -question-	fine	946	1640	61
1.2442230547442557E-60	# followfriday	thanks for the	128	3077	41
1.381569856070736E-60	sick	better soon	1698	313	45
1.6289398134399283E-60	can i	you can	1279	3095	83
1.7316410112360364E-60	how are you	and you -question-	1261	186	37
2.2938045841791244E-60	you been	i 've been	479	914	43
2.9981307468873924E-60	do you	i do	4481	6946	209
3.2201175809135537E-60	great	thanks for	6020	5033	206
3.7547758780500105E-60	sick	get well	1698	244	42
3.990116973922681E-60	you -question-	how are	3094	2363	105
9.2475416458798E-60	friday	for the	2501	8195	167
1.3869642628773175E-59	morning	today	6106	6308	234
1.6675765839019188E-59	boa	noite	83	41	18
2.3933341817264426E-59	u -question-	m	1092	26562	195
2.52828202206381E-59	you -question-	fine	3094	1640	90
2.8724450251879716E-59	lol	lmao	11115	5744	314
2.8761858798216306E-59	ra	: wm	45	14	14
3.47375025538241E-59	hey	how are you	5300	1793	116
4.53832575023538E-59	how are you -question-	i 'm fine	563	135	29
4.53832575023538E-59	how are you -question-	m fine	563	135	29
4.5917659771093295E-59	you today	you -question-	214	4875	52
4.868624398194576E-59	u -question-	i 'm	1092	26421	194
5.011155957011405E-59	# followfriday	thanks for	128	5033	45
5.124893390057993E-59	you -question-	im	3094	11584	223
5.625548359525795E-59	decode	ra	17	62	15
6.413699623854345E-59	ff	for the	417	8195	76
6.5137713850203894E-59	i love	too -exclam-	6643	3764	184
7.0602886345415705E-59	did you	yes i did	2913	109	38
7.254351647243908E-59	have you	i have	1461	7393	122
7.917228444206292E-59	mays	billy	201	161	25
9.329712918650219E-59	-exclam- how	are you	1398	12009	149
9.450666598055687E-59	how are	, how	1760	1221	66
9.916340871368232E-59	how are you	fine thanks	1261	59	28
9.918917524716624E-59	how r	u -question-	352	1507	44
1.0201597298534262E-58	good	day	19578	7913	560
1.1286384163485757E-58	are you -question-	im good	946	303	38
1.5369802651268942E-58	question	answer	1307	808	53
1.5849280044980192E-58	you doing	you -question-	662	4875	75
1.8489030003789262E-58	how are you -question-	good thanks	563	141	29
1.8844435393881458E-58	happy	day	4650	7913	226
1.9869708436300662E-58	rt	retweet -exclam-	15729	66	47
2.0044904103993925E-58	the birthday wishes	happy	50	4223	33
2.4425522916685854E-58	to see	see it	3449	1036	78
2.6059490117158904E-58	trending	topics	927	146	32
3.421216324769026E-58	r u	i 'm good	1250	513	46
3.5616107790563674E-58	gaga	lady	263	884	36
3.772380322412213E-58	how are	good .	1760	1681	73
4.109316506434561E-58	r u	m good	1250	515	46
4.1832655982741585E-58	not feeling	feel better	186	723	32
7.030253050399063E-58	sick	well soon	1698	226	40
7.074012969074874E-58	good night	goodnight	645	410	37
7.214857036957752E-58	rt	for the retweet -exclam-	15729	42	39
7.214857036957752E-58	rt	the retweet -exclam-	15729	42	39
7.402390037030302E-58	-exclam- i miss	miss you	118	1424	33
9.165682016781298E-58	how u	u -question-	551	1507	49
9.399748439548972E-58	moon	a space station .	573	23	20
9.399748439548972E-58	moon	s a space station	573	23	20
9.399748439548972E-58	moon	space station .	573	23	20
9.399748439548972E-58	moon	it 's a space	573	23	20
9.399748439548972E-58	moon	s a space	573	23	20
9.687615459241563E-58	u -question-	good	1092	23545	181
1.0001391098135094E-57	how are	-exclam- how	1760	1911	76
1.0960246044822735E-57	hey	u -question-	5300	1507	106
1.2157772385691567E-57	firefox	3 .5	259	50	21
1.2296542301874469E-57	3gs	iphone	333	1400	42
1.6030383259991328E-57	wm	ra	19	62	15
1.6088995508555447E-57	good	morning -exclam-	19578	451	107
2.1345478507046255E-57	you today -question-	you -question-	141	4875	45
2.2614575743602163E-57	thanks for	problem	1663	1010	60
3.738837861676312E-57	media	social	495	244	31
4.112693875563154E-57	wishes	happy	316	4223	55
5.634741152941467E-57	moon	a space station	573	24	20
7.77825011214109E-57	social	media	546	227	31
1.0798168058828163E-56	-exclam- how	u -question-	1398	1507	64
1.4633559190999967E-56	won	win	723	1209	49
1.5058564022661061E-56	are you	and you -question-	6415	186	52
1.7759307627808296E-56	happy friendship	friendship day	44	27	15
1.9034448622692692E-56	follow friday	the follow	485	305	32
2.02320166774088E-56	to meet	meet you too	491	27	20
2.425365184380208E-56	-exclam- how are	good	354	23545	102
3.141752071287654E-56	slept	sleep	408	2934	53
4.130011354971329E-56	my birthday -exclam-	happy	84	4223	37
4.631935538709256E-56	great	for the	6020	8195	263
4.682763765500632E-56	google	chrome	994	85	28
6.457699852202105E-56	rt	thx for the	15729	157	63
7.212621876245389E-56	birthday	b-day	2458	119	36
7.558216745397099E-56	how was the	it was	153	5694	47
8.436948685065049E-56	the birthday wishes	happy birthday	50	1008	25
1.3558698533393089E-55	you been	ve been	479	1290	44
1.5885045870760276E-55	how are	im great	1760	65	29
1.995530080535169E-55	won	congrats	723	1789	54
1.9956070657665883E-55	voice	google	826	686	43
2.047773847391757E-55	0	,	124741	95631	22348
2.1658245557359748E-55	airport	a safe	755	282	34
3.292482849992491E-55	tired	sleep	2270	2934	96
5.404432977059786E-55	what does	it means	445	190	28
5.476096179294563E-55	i miss	too -exclam-	1739	3764	95
5.604946430943433E-55	wishes	happy birthday	316	1008	37
6.119122903344333E-55	-exclam- how are	are you	354	12009	78
6.594628796381514E-55	how u	good	551	23545	124
7.765333481384507E-55	how r u	i 'm	297	26421	97
8.29154328611387E-55	how u	i 'm good	551	513	36
8.60806939643577E-55	to watch	movie	1553	2827	81
9.464637293632598E-55	been -question-	i 've been	352	914	37
9.569585910130681E-55	how u	m good	551	515	36
9.846292574436377E-55	how was	was great	753	258	33
1.0182647431894836E-54	morning	to you too	6106	173	49
1.0777605370449987E-54	today	happy	13159	4223	279
1.09807667560678E-54	are you -question-	m fine	946	135	30
1.09807667560678E-54	are you -question-	i 'm fine	946	135	30
1.1047997913388026E-54	-exclam- how are you	are you -question-	254	1450	38
1.1902868220930682E-54	happy	to you	4650	2301	117
1.2387285841067623E-54	how r u	m	297	26562	97
1.3365211255268637E-54	friday	thanks for	2501	5033	126
1.4038758859000728E-54	hey	how are you -question-	5300	846	81
2.8474113322670685E-54	r u	im	1250	11584	133
4.366332844799844E-54	going to	have fun	8502	2044	146
4.392029700866342E-54	how r u	im good	297	303	28
4.420469480600049E-54	good morning	morning ,	1811	261	40
4.708713726580554E-54	are you -question-	good thanks	946	141	30
5.352361615006288E-54	good morning	to you too	1811	173	36
5.859485853802924E-54	s my	happy	786	4223	72
6.221271301102111E-54	to bed	sleep well	1515	182	35
9.670768590463422E-54	what does	means	445	953	39
9.777676502127287E-54	sick	get well soon	1698	208	37
1.0832967583315138E-53	watching	to watch	6587	891	89
1.8349233408551936E-53	app	iphone	829	1400	51
2.544735097920087E-53	wan na	i wan	4192	1676	96
2.6697638474562154E-53	nice to meet	meet you too	67	27	15
2.7624346989512186E-53	vote for	voted for	276	70	21
3.6991233381720543E-53	roads	re going we	60	13	13
3.6991233381720543E-53	roads	re going we do	60	13	13
3.6991233381720543E-53	roads	where we 're going	60	13	13
3.6991233381720543E-53	roads	going we	60	13	13
3.6991233381720543E-53	roads	-question- where we 're	60	13	13
3.6991233381720543E-53	roads	we 're going we	60	13	13
3.6991233381720543E-53	roads	going we do	60	13	13
3.6991233381720543E-53	roads	going we do n't	60	13	13
4.46160399743955E-53	moon	space station	573	31	20
5.132861582560485E-53	sleep	slept	4135	281	50
5.217796776567338E-53	birthday .	happy birthday	166	1008	31
6.613660670861733E-53	birthday today	happy	65	4223	33
7.46682059017185E-53	how r	im	352	11584	75
8.012031559014919E-53	sick	hope	1698	7495	124
9.47120058755406E-53	-dots- how	good	985	23545	164
1.187069995335212E-52	how are you	i 'm doing	1261	262	36
1.3725086933744069E-52	how are you	m doing	1261	263	36
1.4380758349474037E-52	airport	have a safe	755	259	32
1.5317449198028886E-52	vote	voting	637	113	26
1.7178415547231963E-52	listening to	album	2113	871	58
2.4902298086033577E-52	friendship day	happy friendship	52	23	14
2.5122126506354565E-52	blog	rt	2142	4600	110
2.636063265411447E-52	dia	bom	159	95	20
2.7635652552728222E-52	thank you	welcome -exclam-	2068	231	39
3.1050578655767982E-52	exam	luck	290	2391	43
3.685822541577464E-52	how are	i am	1760	6586	118
4.109547066568128E-52	mean -question-	means	354	953	36
4.494983507259889E-52	: new	thanks for	174	5033	45
5.201909240591729E-52	follow	thank you	3580	3346	120
8.02025047328889E-52	awake	sleep	947	2934	66
8.784419888436259E-52	forward to	looking forward	918	627	41
9.649192008439636E-52	day	happy	13084	4223	272
1.052194054096904E-51	are you	yes i am	6415	188	49
1.0745076554719665E-51	follow	for the -emo-	3580	512	57
1.1308372745389188E-51	lmao	lol	4300	16213	314
1.1626649766158802E-51	how are	am good	1760	83	29
1.2613714220241974E-51	, how	you -question-	1065	4875	83
1.3063046175807157E-51	www	site	1345	1064	53
1.3983457311360154E-51	my hair	hair -question-	876	110	27
1.4555807873513475E-51	night	sleep well	7719	182	51
1.4767506466420242E-51	di	ga	766	565	38
2.1757353410798235E-51	bike	ride	532	585	35
2.2493671811829622E-51	driving	drive	995	769	44
2.313338248185464E-51	listening	album	2333	871	59
3.6145799744901217E-51	are you	im good	6415	303	57
3.688987544053316E-51	follow	ff	3580	496	56
4.5951425091304586E-51	blog	thanks for	2142	5033	113
5.911032000388235E-51	looking forward	forward to	804	820	42
5.941595436927861E-51	been -question-	ve been	352	1290	38
6.419687925042096E-51	ako	ka	243	569	29
7.738585561559207E-51	my bday	birthday	194	1956	36
8.26440836134905E-51	thanks for the	no problem	813	311	33
8.398604829159917E-51	are you today	you -question-	139	4875	41
9.59047961294728E-51	i miss you	you too -exclam-	378	368	29
1.0224589202910309E-50	-dots- how	i 'm good	985	513	39
1.0734772090692688E-50	iphone	tweetie	2666	148	36
1.1932635972806999E-50	-dots- how	m good	985	515	39
1.2083095026705033E-50	u -question-	im good	1092	303	35
1.3577467418745195E-50	writing	write	877	701	41
1.8016430690111848E-50	sick	you feel	1698	689	49
1.8031773708147683E-50	mean -question-	it means	354	190	25
1.9473981263122532E-50	miss	too -exclam-	3533	3764	124
2.0710427072310756E-50	roads	-question- where we	60	16	13
2.274364615607608E-50	m back	welcome back	349	346	28
2.274364615607608E-50	i 'm back	welcome back	349	346	28
2.682425707537839E-50	i love	me too	6643	2471	137
2.7797298159577694E-50	how r u	im	297	11584	68
2.95125945758678E-50	-url	nl-	2738	858	61
2.95125945758678E-50	-url -pseq-	-pseq- nl-	2738	858	61
2.95125945758678E-50	-url	-pseq- nl-	2738	858	61
2.95125945758678E-50	-url -pseq-	nl-	2738	858	61
2.999145179140017E-50	plane	flight	497	458	32
3.3053421682640907E-50	nice to meet	to meet you too	67	24	14
4.301232878759744E-50	lost	lose	1841	415	43
5.281823763208948E-50	good morning	morning to you too	1811	48	25
5.553837787177719E-50	birthday	thank you	2458	3346	99
5.799809726405038E-50	firefox 3	3 .5	86	50	16
5.871672639797486E-50	miss my	i miss	321	2031	41
7.093834208898091E-50	my head	your head	846	243	31
7.237584376359433E-50	wish i	i wish	1404	1770	62
7.798408642025343E-50	mo	ko	392	519	31
8.80127091117166E-50	roads	where we 're	60	17	13
1.0121519981865867E-49	my birthday	your birthday	498	215	27
1.516004805413499E-49	just watched	movie	411	2827	48
1.5271178125934077E-49	birthday today	happy birthday	65	1008	24
1.549418305186869E-49	follow friday	for the follow	485	267	28
1.659053679812875E-49	move	moving	961	460	37
1.9259618715305023E-49	should i	you should	1327	2884	72
2.4704713244997012E-49	, how are	good	204	23545	74
2.940338139782932E-49	r u	u -question-	1250	1507	56
2.9517541403498408E-49	-exclam- i miss	i miss you	118	809	26
3.2285527534322262E-49	ride	bike	806	349	33
3.966466135352812E-49	you -question-	m great	3094	91	32
3.966466135352812E-49	you -question-	i 'm great	3094	91	32
5.4874484209026136E-49	roddick	federer	100	49	16
5.5576264257057816E-49	blackberry	bb	689	592	36
5.849591555690733E-49	how was your	yours -question-	209	295	24
6.325009386100453E-49	would you	i would	789	2710	58
6.5319867160306876E-49	are you	. you -question-	6415	239	51
6.793300350468419E-49	my phone	your phone	845	299	32
6.867921569032462E-49	are you	good thanks	6415	141	43
7.014287934678417E-49	transformers	megan	709	195	28
7.067281790573072E-49	sa	ako	420	324	28
7.224115989717162E-49	. how	m good	1445	515	42
7.598017868059434E-49	-exclam- wish me	luck	58	2391	27
8.133649302736374E-49	i need	you need	4404	1758	95
8.204771583065827E-49	doing -question-	you -question-	699	4875	68
9.547138809256782E-49	ako	lang	243	321	25
1.0936228514575337E-48	: new	for the rt	174	964	29
1.5679346540528152E-48	do n't	i do	10858	6946	324
1.6943477151891283E-48	how 's	you -question-	850	4875	73
1.8232718742010573E-48	are you today -question-	you -question-	110	4875	37
2.178324195846083E-48	was the	it was	951	5694	81
2.5942532090341614E-48	are you	u -question-	6415	1507	104
2.743492993084701E-48	miss my	miss you too	321	253	25
2.761133639266567E-48	how are you today	you -question-	133	4875	39
2.9152312352801677E-48	moon	a space	573	46	20
3.1085471529133996E-48	sa	nga	420	238	26
3.330557003439418E-48	morning everyone	good morning	151	985	28
4.219182254705427E-48	in love	love with	514	163	25
4.4084314081688965E-48	birthday .	happy	166	4223	40
4.4675578976636085E-48	norris can	chuck norris	20	120	14
4.4748833713419096E-48	to meet	meet you	491	249	27
5.229275218045584E-48	from -question-	im from	303	81	20
5.520581451712717E-48	: new	the rt	174	1019	29
5.722691845738069E-48	ko	mo	339	595	30
6.247039516583593E-48	day	good	13084	23545	883
6.851253274906881E-48	wat	chillin	1937	557	46
7.552523496457509E-48	he 's	he is	2210	1274	63
8.031644251482187E-48	birthday	-exclam- happy	2458	252	39
8.119059822204059E-48	are you	i 'm great	6415	91	37
8.119059822204059E-48	are you	m great	6415	91	37
8.121025936355438E-48	thanks for	welcome .	1663	170	32
8.850689279835404E-48	firefox	0.5	259	165	22
9.504879385291613E-48	great	thanks for the	6020	3077	142
1.239072230455891E-47	harry	hp	1391	178	31
1.24382251207525E-47	:	#	32150	2867	363
1.310706175339093E-47	norris can	chuck	20	236	15
1.3520040767329289E-47	-dots- wish me	luck	54	2391	26
1.3778654395211485E-47	good night	dreams	645	549	34
1.3784095951547276E-47	how are u	good	170	23545	67
1.9330129024534834E-47	(	)	10311	3929	218
2.0456564179383637E-47	lost	followers	1841	994	54
2.241423729784426E-47	hey	m	5300	26562	489
2.2504223187105685E-47	. how	i 'm good	1445	513	41
2.2514175865464437E-47	goodnight	dreams	736	549	35
2.440973769739446E-47	moon	station .	573	50	20
2.4796844346943853E-47	sleep	good night	4135	587	59
2.605415661629285E-47	: new	rt	174	4600	41
2.6227792878825625E-47	did you	no i	2913	906	61
2.787267141534556E-47	topic	a trending	730	152	26
2.844520687272637E-47	-pseq- nl-	-url -pseq-	2570	889	58
2.844520687272637E-47	-pseq- nl-	-url	2570	889	58
2.844520687272637E-47	nl-	-url -pseq-	2570	889	58
2.844520687272637E-47	nl-	-url	2570	889	58
3.5436181239915784E-47	love	me too	14432	2471	201
4.112338691714207E-47	how are	i am good	1760	71	26
4.2290028082293416E-47	how r	you -question-	352	4875	52
4.527350033217459E-47	i look	you look	457	544	31
5.280437703108385E-47	hey	. how	5300	1763	101
6.005599231798619E-47	are you	. how are	6415	340	56
6.378261868919249E-47	green -question-	iran	50	129	16
6.992244590913123E-47	day	hope	13084	7495	381
6.997148398224427E-47	ready	have fun	3432	2044	89
7.595268640904043E-47	sa	lang	420	321	27
7.98261112996676E-47	are you	. how	6415	1763	110
8.269625951284538E-47	thanks for	welcome -exclam-	1663	231	34
8.412762933780581E-47	cold	warm	1055	279	32
8.459790975849738E-47	to watch	watch it	1553	679	45
8.6304257876575805E-47	my pants	in my	131	2077	31
9.006245725358949E-47	i wan	wan na	1756	3805	87
1.0465956973730763E-46	miss	u too	3533	247	42
1.0780032437595507E-46	how are	tired	1760	957	52
1.2996355122364947E-46	transformers	megan fox	709	91	23
1.6087642181290456E-46	-exclam- how	m	1398	26562	202
2.0809277839032312E-46	airport	have a	755	6790	77
2.542132572187773E-46	how was	was cool	753	109	24
2.7664924990448436E-46	its my	happy	198	4223	41
3.2909538372006927E-46	, how are	you -question-	204	4875	43
4.084051574714997E-46	i love	love you too -exclam-	6643	73	34
4.441614716588272E-46	how r u	u -question-	297	1507	35
4.468550238201173E-46	, how	i 'm good	1065	513	37
4.581734901250221E-46	nice to meet	to meet you	67	161	17
4.754754077358751E-46	bed	sweet	3393	2118	89
5.1700408532793586E-46	, how	m good	1065	515	37
6.096858828000883E-46	blog	for the rt	2142	964	55
6.3259987547274616E-46	hey	i 'm	5300	26421	483
7.142877013631402E-46	eat	food	2474	1507	68
7.166527228764018E-46	google	invite	994	450	35
7.411677418820494E-46	mj	memorial	1294	163	29
7.924419916859928E-46	harry potter	potter is	1225	26	19
8.08309702174988E-46	montana	hannah	200	151	20
8.776115701674746E-46	are u	m	834	26562	149
9.001529209940246E-46	happy birthday	birthday to	755	114	24
9.170727861290663E-46	from -question-	i 'm from	303	102	20
1.0955420054074062E-45	sa	ka	420	569	30
1.1274359386818255E-45	anniversary	happy	257	4223	44
1.1375266798099097E-45	from -question-	m from	303	103	20
1.1468865458899844E-45	nice to meet	meet you	67	249	18
1.1956017419529433E-45	happy	to you too	4650	173	40
1.2752454496783905E-45	tonight	be there	7378	1131	94
1.2867314966357627E-45	how was	was yours	753	47	20
1.3580381766686196E-45	bruno	see it	543	1036	37
1.6297818701757134E-45	watching	watch it	6587	679	72
1.6665836387341643E-45	my life	your life	1262	226	31
1.6768657645073288E-45	( via	thanks for the rt	978	701	39
1.7535659934501037E-45	goodnight	sweet dreams	736	245	28
1.8791480074667225E-45	how r u -question-	good	151	23545	62
2.276444129260295E-45	( via	thanks for	978	5033	75
2.3323373329066938E-45	thank you	no problem	2068	311	38
2.453316225121503E-45	watching	movie .	6587	354	56
3.314962857659779E-45	-exclam- how	i 'm	1398	26421	199
3.532104946513396E-45	na	gon	10219	5225	253
3.57854144830028E-45	thanks for the	you 're welcome	813	266	29
3.732563584216652E-45	good	to you	19578	2301	226
4.063428045532984E-45	hannah	montana	260	94	19
4.147099897275152E-45	. how	you -question-	1445	4875	87
4.323773303310094E-45	hey	good	5300	23545	443
4.5748958329656974E-45	its my	birthday	198	1956	33
4.601262875320587E-45	how are	and you	1760	1630	61
5.025960463701289E-45	thanks for the	re welcome	813	269	29
6.003145094742107E-45	social media	rt	229	4600	43
6.174504413013084E-45	in my	my pants	3550	93	31
6.284045195018412E-45	nigga	lmao	1403	5744	92
6.583963077752877E-45	of july	happy	419	4223	51
6.621365571322132E-45	just me	just you	305	83	19
6.849173541486379E-45	interview	good luck -exclam-	870	384	32
7.258072758826407E-45	how was	my day was	753	39	19
7.757231969325273E-45	miss u	miss you	185	1424	30
7.87532981454995E-45	age 3	ice age	80	66	15
8.148013646869789E-45	potter	hp	1278	178	29
8.996532016112922E-45	harry	potter is	1391	26	19
9.8551614804948E-45	are u	i 'm	834	26421	147
9.884853433134964E-45	how was	day was	753	65	21
1.0451705314170531E-44	how are you	-exclam- how	1261	1911	57
1.1380242928685168E-44	was your	yours -question-	310	295	24
1.1513793980184328E-44	how are you	, how	1261	1221	49
1.1575853113052246E-44	blog	the rt	2142	1019	55
1.1849450435340893E-44	palm	pre	160	114	18
1.1947075252264287E-44	happy	bday	4650	557	58
1.279660910833277E-44	( via	for the	978	8195	91
1.3739932345849525E-44	i miss	miss u too	1739	51	23
1.895413483508929E-44	off to	enjoy	2362	1989	73
2.1163741476763096E-44	flight	safe	679	982	38
2.522732495794173E-44	-exclam- how are	m	354	26562	94
2.695193003792406E-44	did n't	i did	3058	3269	101
3.8256266663760007E-44	post :	rt	423	4600	52
3.9562905136673006E-44	how was	was yours -question-	753	32	18
4.48511210368211E-44	coffee	cup	1680	304	35
4.515253712158801E-44	miss you -exclam-	miss you too	79	253	18
5.797998138322776E-44	post	rt	2014	4600	97
6.567252134727414E-44	4th	fireworks	812	215	27
6.74438539106718E-44	july	happy	1219	4223	75
7.930842290877612E-44	the airport	safe	415	982	33
8.351333599393774E-44	firefox 3	0.5	86	165	17
8.533152849271672E-44	roads	we do n't need	60	36	13
9.654985615821585E-44	follow friday	thanks for the follow	485	207	24
1.053303745955496E-43	mane	gucci	94	102	16
1.0784133409367575E-43	u been	been good	363	107	20
1.0842135225799784E-43	ka	lang	312	321	24
1.2168143343678717E-43	lmfao	lmao	1155	5744	83
1.2236324189307282E-43	my new	your new	1840	541	42
1.2408562458026528E-43	-exclam- how are	i 'm	354	26421	93
1.2488037388788737E-43	, how are you	good	160	23545	62
1.5646033635046191E-43	4th	july	812	573	34
1.584304652478758E-43	moon	that 's no	573	72	20
1.724551901517259E-43	gon	na	5637	9691	253
1.843678392149606E-43	the beach	beach -exclam-	767	72	21
1.883761768177631E-43	airport	safe flight	755	114	23
1.9059491327294895E-43	birthday	, happy	2458	82	27
1.9609561264755965E-43	your day	my day	294	349	24
2.195904423758046E-43	. how are	you -question-	235	4875	43
2.876722017911513E-43	you been -question-	good	144	23545	59
2.885653632196282E-43	wishes -exclam-	happy	41	4223	25
2.9258386808655726E-43	sweet dreams	night	152	5138	38
3.05385369217417E-43	why do	because they	1224	180	28
3.0594857921352366E-43	did you	nope	2913	1359	67
4.02610215995342E-43	morning	how are you -question-	6106	846	74
4.092031105208419E-43	-exclam- lol	lmao	2693	5744	123
4.317941699771903E-43	hey	are you -question-	5300	1450	88
5.184660705063503E-43	for the	re welcome	7891	269	52
5.698203070961787E-43	love with	in love	326	266	23
5.753647865199084E-43	twitter	followers	9747	994	97
5.785564185113916E-43	to meet you	meet you too	96	27	13
5.822262392999557E-43	birthday to me -exclam-	happy birthday	29	1008	18
6.184697875141859E-43	wish i	wish you	1404	349	34
6.38471375669226E-43	ako	sa	243	542	25
7.313739313349709E-43	-url	video	2738	2192	79
7.313739313349709E-43	-url -pseq-	video	2738	2192	79
8.784067744708574E-43	did you	it was	2913	5694	127
1.0492867704047341E-42	morning	have a	6106	6790	212
1.0524246301256799E-42	-dots- wish me	good luck	54	1950	23
1.1141894890375479E-42	how are	doing good	1760	99	26
1.1938886651595654E-42	you were	i was	1007	7608	87
1.3856968506317313E-42	happy canada	canada day	41	34	12
1.465868524335453E-42	game	play	2423	2140	74
1.4687194916897663E-42	diego	san	230	313	22
1.475497716718278E-42	my birthday	happy birthday ,	498	90	20
1.6271592121811572E-42	interview	luck -exclam-	870	454	32
1.6611323475719825E-42	bday	birthday -exclam-	705	375	29
1.8882851607064942E-42	morning	you -question-	6106	4875	174
2.0636762939188527E-42	have you	not yet	1461	311	33
2.092370120251637E-42	)	(	5485	7656	213
2.1615188507967176E-42	post	for the rt	2014	964	51
2.2027209101213817E-42	its my	happy birthday	198	1008	27
2.5860889098163242E-42	off to	have a	2362	6790	124
2.6103899513897677E-42	ice cream	cream -exclam-	798	61	20
2.6212088026955967E-42	miss my	miss you	321	1424	33
2.691123909133293E-42	how are you	i am	1261	6586	90
2.6919597076893837E-42	to bed	sweet	1515	2118	61
2.87697716883486E-42	it 's	it is	12627	3925	235
3.082808289268488E-42	help : -emo-	answered your question -emo-	8	8	8
3.082808289268488E-42	need help : -emo-	answered your question -emo-	8	8	8
3.288010508122944E-42	youtube	video	946	2192	52
3.514515519421874E-42	work	day	8676	7913	290
3.790753200471357E-42	did you	i did .	2913	166	33
3.8760981302782794E-42	ass	lmao	2842	5744	125
5.004345245671131E-42	for the	you 're welcome	7891	266	51
5.3045023700794155E-42	miss u	i miss	185	2031	31
5.325221738165368E-42	how are	m good ,	1760	62	23
5.325221738165368E-42	how are	i 'm good ,	1760	62	23
5.380603861101661E-42	dance	dancing	938	339	30
5.5286016950777345E-42	: the	rt	599	4600	57
5.658513325748776E-42	how are	. you -question-	1760	239	32
5.780763882902445E-42	did you	did .	2913	410	43
6.404740761480914E-42	just woke	woke up	493	412	27
6.605779405842075E-42	find	found	3000	1285	65
6.868406827292951E-42	social	rt	546	4600	55
6.901285773246822E-42	my birthday	birthday ,	498	124	21
7.274736852845687E-42	google	voice	994	713	37
7.40712220515573E-42	-exclam- how	. how	1398	1763	55
8.225934551796094E-42	app	tweetie	829	148	24
8.419936917313438E-42	-exclam- wish me	good luck	58	1950	23
1.1104102571355914E-41	vote for	i voted	276	69	17
1.1175405945456701E-41	how are you	good .	1261	1681	52
1.192445778629457E-41	nice to	meet you too	365	27	15
1.211860316669027E-41	u doing	u -question-	318	1507	33
1.2926623031306167E-41	voice	invite	826	450	31
1.3265043814182123E-41	, how are you	you -question-	160	4875	37
1.3511014782219701E-41	what 's	chillin	4106	557	53
1.448497838661461E-41	love you -exclam-	love you too	157	308	20
1.4978156536260353E-41	work	job	8676	1889	124
1.5045894295726164E-41	happy	birthday to	4650	114	33
1.575154856569334E-41	post	thanks for	2014	5033	98
1.6277347214780438E-41	july -exclam-	4th	101	494	20
1.6861336528972831E-41	how are you -question-	im	563	11584	79
1.7096344988054009E-41	-exclam- wish	luck	128	2391	29
1.8453713911388147E-41	going to	fun	8502	5799	233
1.8683351744513387E-41	how have	been good	121	107	16
1.9405816503593945E-41	check	video	3574	2192	87
2.0076004816048432E-41	harry potter	hp	1225	178	27
2.281872675371215E-41	how are you -question-	m great	563	91	20
2.281872675371215E-41	how are you -question-	i 'm great	563	91	20
2.3228478543816615E-41	want a	i want	819	3589	58
2.619417495114541E-41	-dots- wish me luck	good luck	50	1950	22
2.6204721477852886E-41	wishes -exclam-	birthday	41	1956	21
2.7745274618749184E-41	help : -emo-	answered your question	8	9	8
2.7745274618749184E-41	need help : -emo-	answered your question	8	9	8
2.7745274618749184E-41	need help :	answered your question -emo-	9	8	8
2.8431785488262044E-41	twitter	follow	9747	2826	164
2.955643741201291E-41	listening to	listen to	2113	624	44
3.0518636646664474E-41	been -question-	i 've been good	352	29	15
3.1188616615072967E-41	-exclam- how are	m good	354	515	26
3.14076790981363E-41	cream -question-	ice cream	58	511	18
3.1880568345855295E-41	cheese	grilled	733	73	20
3.2852396561839856E-41	post	the rt	2014	1019	51
4.279403243756628E-41	you .	you too	2040	1314	56
4.283854067583416E-41	brothers	jonas	462	399	26
4.297571239411805E-41	surip	mbah	32	28	11
4.59923848507735E-41	all the birthday	happy	30	4223	22
4.762964525987044E-41	good morning	today	1811	6308	103
5.766184627219726E-41	exam	good luck	290	1950	34
5.872635275503889E-41	nite	night	699	5138	62
6.100411198827027E-41	been -question-	ve been good	352	30	15
6.597433046548498E-41	in my	in your	3550	1265	68
6.748153849134687E-41	sleep	awake	4135	485	50
6.755984421501677E-41	birthday	cake	2458	588	45
6.944125984175736E-41	are you	fine thanks	6415	59	29
7.327761314033532E-41	palin	sarah	255	204	20
7.589743247843763E-41	a hug	hugs	119	744	22
7.971226920935634E-41	for the	no problem	7891	311	53
8.034553607480906E-41	my hair	cut	876	709	35
8.109307684260661E-41	how are you -question-	. how	563	1763	40
8.857574859111376E-41	how are you	-exclam- how are	1261	447	34
9.893428279156721E-41	listening	listen to	2333	624	45
1.0174593151942278E-40	( via	thanks for the	978	3077	58
1.0409509777271305E-40	bom	dia	103	204	17
1.0823317951264146E-40	up -question-	you -question-	1037	4875	71
1.117740293900457E-40	4th	of july	812	167	24
1.1960345071802533E-40	sick	hope you	1698	2471	66
1.2050283247642533E-40	watching	love that movie	6587	141	38
1.2075148915810432E-40	: new	thanks for the	174	3077	33
1.2122306609031011E-40	morning	coffee	6106	949	75
1.233065873836126E-40	. i miss	miss you	191	1424	28
1.285885012518908E-40	my dog	your dog	238	90	17
1.2901447347783623E-40	way to	have fun	1977	2044	65
1.3071283604734548E-40	follow me	follow you	475	186	22
1.387263731309884E-40	help : -emo-	your question -emo-	8	10	8
1.387263731309884E-40	need help : -emo-	your question -emo-	8	10	8
1.5371278911905703E-40	ng	ko	213	519	23
1.6917026522800156E-40	i miss my	miss you too	214	253	20
1.7716577678249948E-40	ice cream	icecream	798	73	20
1.8208909886956183E-40	gi	joe	98	575	20
2.0997353276625234E-40	how was	it was cool	753	60	19
2.4970708965077664E-40	need help :	answered your question	9	9	8
2.603142541361102E-40	fingers	crossed	474	192	22
2.6084025429131674E-40	were you	i was	281	7608	50
2.8722847883852944E-40	goodnight	sleep	736	2934	51
3.0709268307369246E-40	os	google	291	686	26
3.326726886352655E-40	are you -question-	im	946	11584	99
3.5438733313014313E-40	rt	retweet .	15729	38	30
3.5592659696841353E-40	nl-	video	2570	2192	74
3.5592659696841353E-40	-pseq- nl-	video	2570	2192	74
3.6074574721745982E-40	are you	i 'm doing	6415	262	46
3.717703989470425E-40	how r u	you -question-	297	4875	44
3.778932826463043E-40	-exclam- wish me luck	good luck	55	1950	22
4.325337774551387E-40	are you	m doing	6415	263	46
4.539236429528535E-40	-dots- wish	luck	124	2391	28
5.5430116066881974E-40	nervous	luck	372	2391	38
5.693280454842799E-40	how are	about you	1760	692	42
6.389341597464377E-40	ice cream	cream .	798	60	19
6.821482557188813E-40	depp	johnny	76	140	15
7.012952725662361E-40	movie	see it	3290	1036	60
7.019702301960863E-40	you did	i did	502	3269	46
7.163095201484074E-40	love	you too -exclam-	14432	368	70
7.39037834616246E-40	my son	your son	208	53	15
8.292588800211076E-40	dia do	feliz dia	13	17	9
9.155436419297334E-40	harry	potter -exclam-	1391	39	19
9.221781595980565E-40	-url -pseq- nl-	video	2364	2192	71
9.942144137822756E-40	a great	day	1651	7913	108
9.974081250182997E-40	live in	i live	467	374	25
1.032618707135499E-39	its my birthday	happy birthday	39	1008	18
1.0480359622574313E-39	whats	chillin	2064	557	41
1.0714198161218045E-39	feeling	you feel	2382	689	46
1.0986689143573779E-39	morning to	good morning	182	985	25
1.1499308301223798E-39	job	luck	1960	2391	68
1.1876713876688971E-39	to me	to you	2111	2301	69
1.2109398897722015E-39	you been	i 've	479	3950	48
1.2424238574981866E-39	: new	thanks for the rt	174	701	23
1.2485335406385316E-39	need help :	your question -emo-	9	10	8
1.2713525153179373E-39	how r	how are	352	2363	37
1.3172194164971577E-39	u -question-	chillin	1092	557	34
1.4458904752858614E-39	nice to meet you	to meet you too	50	24	11
1.49837937063723E-39	-question- -nl-a :	is he	124	495	20
1.508605794709167E-39	you today	how are	214	2363	32
1.531191576102005E-39	bruno	borat	543	49	17
1.8522243809406297E-39	sa	mo	420	595	27
2.024928579802608E-39	its my birthday	happy	39	4223	23
2.109439636082078E-39	photos	pics	670	1477	39
2.1642460936026756E-39	good morning	-exclam- how	1811	1911	60
2.2314012636377226E-39	nice to	to meet you too	365	24	14
2.2390193864438673E-39	how are	about you -question-	1760	286	32
2.5108061280708007E-39	-question- -nl-a	is he	127	495	20
2.5240481086775704E-39	r u -question-	good	227	23545	68
2.648045834008524E-39	-exclam- how are	i 'm good	354	513	25
2.6605556805225413E-39	happy 4th	4th to	208	24	13
2.9969017201348816E-39	. how are	good	235	23545	69
3.1892223967913596E-39	bed	nite	3393	566	48
3.33604095236835E-39	wishes -exclam-	happy birthday	41	1008	18
3.352748662356493E-39	you been	i 've been good	479	29	15
3.4261692048204383E-39	taylor	swift	312	59	16
3.4442614587799566E-39	potter and	harry	89	557	19
4.272374157411218E-39	feliz	dia	25	204	13
4.352443246646424E-39	are you -question-	i 'm great	946	91	21
4.352443246646424E-39	are you -question-	m great	946	91	21
4.478325170736232E-39	vote for me	voted	53	145	14
4.896769568703479E-39	-nl-a :	is he	131	495	20
5.396659309494735E-39	my ipod	your ipod	293	44	15
5.886230454388056E-39	hows	you -question-	479	4875	51
5.918380949828196E-39	federer	roddick	101	46	13
6.61422334532087E-39	new blog	rt	535	4600	52
6.700481408748388E-39	you been	ve been good	479	30	15
6.837006933800468E-39	good night	sweet dreams	645	245	24
7.108210964916694E-39	4th of july	happy	294	4223	41
7.484806775546595E-39	birthday	happy b-day	2458	51	22
7.504946327020819E-39	book	reading	1502	799	41
7.550803006956174E-39	nice to meet you	meet you too	50	27	11
8.103903928882173E-39	morning	great day	6106	369	50
8.444506596775771E-39	of july	4th of	419	121	19
8.650488479457842E-39	the birthday	happy birthday -exclam-	102	265	17
9.660855700487948E-39	how are	pretty good	1760	494	37
9.983557832739279E-39	miley	cyrus	342	81	17
1.03082337399899E-38	how are	great -exclam-	1760	915	45
1.0754061967175812E-38	off to	night	2362	5138	103
1.079855069266283E-38	: new	for the	174	8195	42
1.0946257645702576E-38	-nl-a	is he	136	495	20
1.1270439473350663E-38	why am i	because you	457	498	26
1.1939411267656197E-38	why am	because you	458	498	26
1.217971369911675E-38	ca n't wait	wait to	1470	1172	46
1.3853798495674545E-38	iphone	apple	2666	463	41
1.493686240027997E-38	good	how are	19578	2363	216
1.749951421608615E-38	miss you	too -exclam-	628	3764	51
1.903226849388219E-38	[	]	570	288	24
1.9362170983604426E-38	for the	welcome .	7891	170	41
2.005882150643739E-38	following me	following you	463	292	23
2.178245194525479E-38	watching	love that	6587	1253	85
2.2964288481299198E-38	job interview	luck	65	2391	23
2.516248578551344E-38	4th of	happy	303	4223	41
2.5222399743792046E-38	followfriday	for the -emo-	174	512	21
2.7882031706113115E-38	n't wait	wait to	1498	1172	46
3.6657064099257237E-38	n't wait	ca n't	1498	6255	90
3.757211360198902E-38	myspace	facebook	779	952	35
3.8240942635768204E-38	cronkite	walter	49	31	11
3.8531080369133367E-38	green	support for	998	46	18
3.98126680864714E-38	app	tweetdeck	829	392	28
4.052307516988062E-38	ga	di	460	811	29
4.0718991774336757E-38	how are you	good ,	1261	778	38
4.1095909968281454E-38	sick	feel better soon	1698	171	27
4.1590210307926667E-38	you today	how are you	214	1793	29
4.2259297883102167E-38	are you doing	you -question-	447	4875	49
4.4812951113840285E-38	how are you	, how are	1261	262	28
4.659655502810138E-38	r u	im good	1250	303	29
5.41115935139444E-38	: the	the rt	599	1019	33
5.41897614909299E-38	ff	thanks for the	417	3077	41
5.745745803504583E-38	coffee	starbucks	1680	230	29
5.799095942242493E-38	san	diego	598	123	20
7.195080504338595E-38	r u -question-	i 'm good	227	513	22
7.207925812426272E-38	good night	sleep well	645	182	22
7.494306958061661E-38	help : -emo-	question -emo-	8	17	8
7.494306958061661E-38	need help : -emo-	question -emo-	8	17	8
7.494306958061661E-38	help : -emo-	answered your	8	17	8
7.494306958061661E-38	need help : -emo-	answered your	8	17	8
7.846950214771814E-38	r u -question-	m good	227	515	22
7.905777506859477E-38	yet -question-	nope	1008	1359	42
7.937314847868748E-38	ice	cream -exclam-	1333	61	20
8.370657833926872E-38	you been	you -question-	479	4875	50
9.419004413080804E-38	follow	the -emo-	3580	1267	65
9.422499709405562E-38	write	writing	769	499	29
1.025838931320025E-37	age	ice	507	865	30
1.0425063152839458E-37	is he	he 's	317	2716	36
1.0950632711789747E-37	good	to you too	19578	173	55
1.1083454530225057E-37	miss you -exclam-	i miss	79	2031	23
1.1743958179846075E-37	how are you	im great	1261	65	20
1.1991298029455759E-37	thank you	you 're	2068	8811	125
1.3479098522198886E-37	mbah	surip	36	22	10
1.3580281651537233E-37	night	sweet	7719	2118	118
1.4368872358940432E-37	mo	sa	392	542	25
1.4529011943396218E-37	google	os	994	152	23
1.4908625955503718E-37	my cat	your cat	161	60	14
1.5158074552108417E-37	n't	me either	31254	166	64
1.6774616482195338E-37	ng	ka	213	569	22
1.7699913439913995E-37	i should	you should	1645	2884	66
1.8003123456032234E-37	to bed	nite	1515	566	36
1.8606952286118136E-37	green	support	998	569	32
1.945471071917583E-37	ice cream	cream -question-	798	45	17
2.074970498289466E-37	day	have a	13084	6790	331
2.107603170874027E-37	how are you	tired	1261	957	40
2.108150914598737E-37	how r u -question-	i 'm good	151	513	20
2.1448700653357157E-37	watching the	movie	1068	2827	55
2.218034212791286E-37	i miss my	miss you	214	1424	27
2.281147766933251E-37	how r u -question-	m good	151	515	20
2.3472966568763842E-37	iphone	apps	2666	177	30
2.365079679033804E-37	listening to	music	2113	1566	57
2.5434688487906125E-37	what time	: 30	568	321	24
2.596345781747931E-37	july -exclam-	happy 4th	101	152	15
2.6343379212316476E-37	ice age	age 3	149	25	12
2.634459226996696E-37	heading	have fun	1274	2044	52
2.692318383302289E-37	swift	taylor	110	208	16
3.21286530412288E-37	: the	for the rt	599	964	32
3.2141814030285465E-37	n't wait	ca	1498	6438	90
3.252555649238231E-37	pro	macbook	434	181	20
3.2969810943314296E-37	. i miss	i miss you	191	809	23
3.386385856268797E-37	passed	congrats	446	1789	35
3.5030741623220636E-37	miss you -exclam-	i miss you	79	809	19
3.522584853171615E-37	hospital	hope	401	7495	54
3.858946553972171E-37	blog post	rt	551	4600	51
3.892156602565685E-37	fathers day	happy fathers	84	23	11
3.915668505551759E-37	dreams	sweet	539	2118	39
3.935747685036622E-37	are you	about you -question-	6415	286	45
3.966031253054636E-37	today	birthday	13159	1956	150
4.1628688220082325E-37	how are	how about you	1760	206	28
4.5281822726880965E-37	cream -question-	ice	58	865	18
4.6976518320548685E-37	of july -exclam-	4th	71	494	17
4.955335805594712E-37	to meet you	nice to meet	96	107	14
4.9887763692135575E-37	public	enemies	529	67	17
5.074163286282224E-37	job	good luck	1960	1950	60
5.1120361669015344E-37	new blog	thanks for	535	5033	52
5.716996848582903E-37	hair	dye	2306	52	21
5.738445010252659E-37	. wish me	good	105	23545	47
5.756222637375708E-37	harry potter	potter -question-	1225	44	18
5.958480171887435E-37	did you	not yet	2913	311	36
6.744783476839794E-37	need help :	question -emo-	9	17	8
6.744783476839794E-37	need help :	answered your	9	17	8
6.875624261245539E-37	are you today	how are	139	2363	27
7.061954269745363E-37	bed	sleep tight	3393	65	24
7.357795427853319E-37	good morning	you -question-	1811	4875	86
7.605218579110464E-37	going to bed	night	427	5138	48
8.303422151345783E-37	interview tomorrow	luck	42	2391	20
8.378421213665628E-37	all the birthday	happy birthday	30	1008	16
8.440063654208618E-37	how are you -question-	. how are	563	340	24
8.583290352939773E-37	-exclam- how	. how are	1398	340	30
8.750983310155723E-37	thank you	your welcome	2068	137	26
8.825661433767215E-37	sleep	bed	4135	1635	76
8.908366661599565E-37	-dots- wish	good luck	124	1950	25
9.17735991584044E-37	to the	have fun	7266	2044	111
9.263539081276043E-37	are you	about you	6415	692	63
9.50404339800351E-37	lang	ako	196	324	19
9.840853991766659E-37	touch	ipod	555	347	24
1.0008585501847341E-36	sick	better -exclam-	1698	484	35
1.0323498311842975E-36	seesmic	tweetdeck	46	392	15
1.0487057688174267E-36	how are	doing great	1760	81	22
1.073990884981109E-36	love my	i love	567	7608	62
1.107626623729689E-36	follow	thanks for the -emo-	3580	334	39
1.2037721321010679E-36	iphone	3 .0	2666	81	24
1.2132067573103761E-36	nigga	shit	1403	4569	74
1.2516985932598327E-36	movie	watching	3290	2829	88
1.2530227160178592E-36	thanks for the	problem	813	1010	35
1.2691739765223303E-36	how are u	m	170	26562	60
1.2998231845187758E-36	weather	rain	1156	931	38
1.3029442534406633E-36	night	good	7719	23545	552
1.3209532646019576E-36	off to bed	good night	276	587	23
1.3280512863457373E-36	friday	the follow	2501	305	34
1.3513742755002214E-36	morning	-exclam- how	6106	1911	98
1.3621902247767385E-36	0	3	405	2480	37
1.3662168824928181E-36	s my birthday -exclam-	happy birthday	17	1008	14
1.4661459837506029E-36	on my way	have fun	885	2044	45
1.477066997270289E-36	3	0	4044	195	34
1.583744121019353E-36	u been	u -question-	363	1507	31
1.6041401138019885E-36	morning -exclam-	good	741	23545	118
1.6355495196119898E-36	happy	birthday -exclam-	4650	375	44
1.7160135782288437E-36	you been -question-	i 've been good	144	29	12
1.7454289196841613E-36	the airport	have a safe	415	259	21
1.8305440190185904E-36	jonas	nick	643	430	26
1.8905588700572408E-36	lost	spam	1841	301	31
1.909255560570505E-36	walter	cronkite	68	16	10
2.0182434185380933E-36	twitter	tweet	9747	3263	169
2.112019305231684E-36	have you been	i 've been	261	914	25
2.1222521703603437E-36	-exclam- wish	good luck	128	1950	25
2.1285936231828455E-36	. wish me luck	good	102	23545	46
2.3433147022880347E-36	love you .	love you too	120	308	17
2.408282133225279E-36	dia do	feliz	13	35	9
2.4793661187461223E-36	are you today	how are you	139	1793	25
2.487422240307939E-36	thanks for the	welcome .	813	170	22
2.8594233698648732E-36	you been -question-	ve been good	144	30	12
2.891102040274301E-36	-exclam- how	good -exclam-	1398	1311	45
3.16274109352538E-36	morning	a great day	6106	333	46
3.241340558766509E-36	good morning	have a	1811	6790	100
3.3342883770005316E-36	help :	answered your question -emo-	25	8	8
3.385094130165292E-36	today	luck	13159	2391	167
3.386484414150549E-36	follow friday	ff	485	496	25
3.44476779505576E-36	morning all	good morning	209	985	24
3.4589532481071526E-36	today	happy birthday	13159	1008	103
3.644070376067345E-36	the birthday	birthday -exclam-	102	375	17
3.644845447171065E-36	is it just	just you	221	83	15
3.6660464911017185E-36	interview tomorrow	good luck	42	1950	19
3.9074139858468654E-36	thank you	very welcome	2068	89	23
4.020523456057906E-36	i miss you -exclam-	miss you too	49	253	14
4.425500909954251E-36	fever	get well	212	244	18
4.929209919947643E-36	ng	ako	213	324	19
5.102681707715342E-36	i need	need a	4404	1187	67
5.132260017959984E-36	my bday	happy	194	4223	34
5.136618733915501E-36	job interview	good luck	65	1950	21
5.459350894085645E-36	media	rt	495	4600	48
5.538338126842695E-36	you have	i have	2520	7393	124
5.578965284862241E-36	lost	spammers	1841	100	23
5.711539586403581E-36	sleep	dreams	4135	549	48
5.715423118927638E-36	harry	potter -question-	1391	44	18
6.187438872466915E-36	july	4th of	1219	121	22
6.262450976796347E-36	roads	we 're going	60	126	13
6.345359750494041E-36	na	i wan	10219	1676	118
6.573713581923791E-36	-exclam- how	. how are you	1398	282	28
6.601425787155259E-36	-exclam- how are you	good	254	23545	68
6.965872699978981E-36	how are	great thanks	1760	37	18
7.004466656750672E-36	wait	ca n't	3848	6255	143
7.146966432125356E-36	ang	ko	222	519	21
7.216295910677497E-36	airport	a safe flight	755	97	19
7.274516337712238E-36	my first	congrats	858	1789	42
7.403364032400838E-36	moon	. it 's a	573	202	21
7.427602029625036E-36	9	district	934	62	18
7.561804138183206E-36	. how are you	you -question-	172	4875	34
7.654646439743017E-36	good night	sleep	645	2934	45
8.060180716893995E-36	friday	ff	2501	496	39
8.163416872751335E-36	sweet	dreams	1743	549	36
8.175440263385374E-36	transformers	fox	709	204	22
8.50749729145772E-36	flight	have a safe	679	259	23
8.633547051135905E-36	roads	where we	60	129	13
8.888977750874711E-36	i miss you -exclam-	i miss you too	49	161	13
9.171798368022472E-36	smiles	you *	410	283	21
9.85118441307045E-36	canada day	happy canada	87	15	10
1.1006197724620708E-35	the airport	a safe	415	282	21
1.1268337286236747E-35	my hair	hair is	876	110	20
1.1325822801622558E-35	feeling	you feel better	2382	308	33
1.1487456147361652E-35	wish me luck .	good luck	44	1950	19
1.1518761881762712E-35	ice	cream .	1333	60	19
1.2480192219072298E-35	enemies	public	171	321	18
1.309162871462222E-35	s birthday	happy birthday	149	1008	22
1.367207031497005E-35	how are you	how about you	1261	206	25
1.3842185975249357E-35	harry potter	potter -exclam-	1225	39	17
1.816249592457255E-35	right -question-	yeah	1213	10662	101
1.8830810354005492E-35	how are you	doing great	1261	81	20
1.897125348689718E-35	morning ,	good	428	23545	87
1.9819425194895312E-35	me luck .	good luck	45	1950	19
2.0135976838490072E-35	morning	today -question-	6106	1518	86
2.0215478050488427E-35	social media	for the rt	229	964	24
2.1570228657038313E-35	how are	i 'm good -exclam-	1760	49	19
2.1570228657038313E-35	how are	m good -exclam-	1760	49	19
2.2529705097975592E-35	icecream	ice cream	113	511	18
2.2722787134614348E-35	been -question-	u -question-	352	1507	30
2.273127608568982E-35	-exclam- i miss	miss you too	118	253	16
2.320382250125502E-35	for the birthday	happy birthday	35	1008	16
2.3307689289147452E-35	3	sims	4044	97	27
2.3486934404816375E-35	early	sleep	2143	2934	72
2.403921605678801E-35	joe	gi	757	79	18
2.4800420054310445E-35	how was	urs -question-	753	60	17
2.657660789558931E-35	ko	sa	339	542	23
2.8343874776020515E-35	too early	never too	212	65	14
2.9060353115093824E-35	shoes	pair	624	198	21
3.000781561751867E-35	help :	answered your question	25	9	8
3.136407606129251E-35	crossed	fingers	184	414	19
3.165312860938828E-35	you 're	m	4022	26562	368
3.2652063021067134E-35	day	great	13084	7545	350
3.490402817835389E-35	bday	happy birthday -exclam-	705	265	23
3.563129867055834E-35	off to	fun -exclam-	2362	1346	54
3.659292838555212E-35	macbook	pro	368	267	20
3.8087952801388603E-35	chrome os	google	49	686	16
3.9470177772511147E-35	how are you -question-	great	563	7545	60
3.967107320539695E-35	wats	chillin	647	557	27
3.974069728551265E-35	wait	ca	3848	6438	144
3.9839354503559106E-35	watch	that movie	4450	724	54
3.9857092157588985E-35	today is	happy	625	4223	50
4.0697403777924345E-35	wish me luck -exclam-	good	119	23545	48
4.099648051666905E-35	listening	music	2333	1566	57
4.123862270606594E-35	wait to	ca n't wait	866	1723	41
4.2733184226527874E-35	meet you	to meet	134	442	18
4.388465647701406E-35	are you -question-	i am	946	6586	71
4.4132954139086806E-35	did you	yes i	2913	948	51
4.4440723506662306E-35	moon	space	573	328	23
4.496833860270688E-35	guitar	hero	425	234	20
5.107636378111698E-35	-exclam- how are	. how are you	354	282	20
5.36103571249557E-35	birthday ,	happy	96	4223	27
5.519098398664174E-35	you 're	i 'm	4022	26421	366
5.977493695600304E-35	how are	how about	1760	856	41
5.98675909911201E-35	happy birthday	bday	755	557	28
6.050397471971348E-35	the airport	flight	415	458	23
6.066487505601415E-35	the game	lost the	385	59	15
6.196711215875551E-35	bed	night night	3393	102	26
6.389756633493282E-35	flight	a safe	679	282	23
6.420642865247886E-35	good	great	19578	7545	467
6.710292889423206E-35	new blog post	rt	387	4600	43
6.714959865211212E-35	how are	how r	1760	435	33
7.036654963784566E-35	meet you	nice to meet	134	107	14
7.633806226052305E-35	social media	the rt	229	1019	24
7.881370355186455E-35	you been -question-	i 've been	144	914	21
7.95796576586109E-35	how r u	how are	297	2363	32
8.021085042319485E-35	what 's up	you -question-	641	4875	53
8.094242124681733E-35	wait to	n't wait	866	1753	41
8.666800868128602E-35	lmao	lmfao	4300	1452	71
9.312062915103384E-35	you do	i do	1669	6946	95
9.614651735845334E-35	how was your	was good	209	385	19
9.637554826199753E-35	listening	that song	2333	804	44
9.88910235083138E-35	he is	he 's	1033	2716	51
9.951678919660567E-35	hey	how r	5300	435	47
1.0038751392214553E-34	off to	have fun -exclam-	2362	560	39
1.0371439485177212E-34	me luck -exclam-	good	121	23545	48
1.0517346827279262E-34	jeff	goldblum	230	26	12
1.0960774387609443E-34	headed	have fun	750	2044	41
1.1013638975785003E-34	ako	naman	243	253	18
1.1051197109732771E-34	love	song	14432	3054	202
1.201717647640722E-34	how are u	i 'm	170	26421	58
1.2236615830281725E-34	how are	yourself -question-	1760	219	27
1.2838934346242082E-34	sa	pa	420	385	22
1.2887523700344677E-34	. how	im good	1445	303	28
1.3594459669229232E-34	you -question-	i am	3094	6586	128
1.4018535401826538E-34	chrome	os	150	152	15
1.4063280755778528E-34	to me -exclam-	birthday	258	1956	29
1.49748255852455E-34	happy	you too	4650	1314	70
1.500351792716149E-34	help :	your question -emo-	25	10	8
1.5491265506696454E-34	watching	film	6587	533	55
1.5500506021671971E-34	this movie	that movie	275	724	23
1.550743187748134E-34	-smi- how	you -question-	187	4875	34
1.6030150218448089E-34	i hate	do you hate	2617	48	20
1.6795561464733652E-34	cream .	ice cream	94	511	17
1.8016814970188145E-34	hey	im good	5300	303	41
1.8053263955294353E-34	watching	movie is	6587	170	36
1.8383029089975708E-34	great	thank you	6020	3346	127
1.8415239372117735E-34	on my way to	have fun	606	2044	38
1.8625651363150429E-34	sick	get better	1698	230	27
1.942436973002309E-34	u been	i 've been	363	914	26
1.9816641683278938E-34	hut	pizza	84	583	17
2.011995178732931E-34	i look	look like	457	839	27
2.0760676492819796E-34	goodnight	sweet	736	2118	41
2.0859249555811172E-34	are you -question-	. how	946	1763	42
2.1144573810863232E-34	watching	i love that movie	6587	108	31
2.232358765456345E-34	how are	-dots- how	1760	1154	45
2.258648676602187E-34	watching	i watched	6587	266	42
2.358858878683201E-34	chuck norris	norris does	203	11	10
2.4179682207694068E-34	how are you	about you	1261	692	34
2.502952042600086E-34	are you	good	6415	23545	472
2.581629296535681E-34	freezing	cold	156	705	20
2.671719648475557E-34	how are	im fine	1760	68	20
2.7395729411244707E-34	i miss my	i miss you too	214	161	16
2.966025022392017E-34	nervous	good luck	372	1950	32
3.118526606328864E-34	twitter	facebook	9747	952	84
3.130879129877905E-34	. i miss	miss you too	191	253	17
3.186035919040091E-34	rt	retweeting	15729	55	31
3.2782401338687366E-34	how u been	good	95	23545	43
3.3623413393625574E-34	is it	s	3337	49160	496
3.3867193868074177E-34	been -question-	i 've	352	3950	39
3.4491111691748602E-34	i feel	you feel	2637	689	43
3.7506431523223343E-34	ice	age	1333	386	29
4.112986073755146E-34	birthday to me -exclam-	happy	29	4223	19
4.347604863134292E-34	how are u	m good	170	515	19
4.470303176645329E-34	how u been	been good	95	107	13
4.533127843005052E-34	friday	for the follow	2501	267	31
4.537183541592552E-34	great day	a great	392	2298	34
4.620619324145634E-34	twitter	tweetdeck	9747	392	56
4.885466778175419E-34	job	congrats	1960	1789	55
4.933419161493788E-34	how you	good	560	23545	98
4.936042667046577E-34	i miss	we miss	1739	105	22
5.067084035502643E-34	airport	trip	755	1070	33
5.464540646981258E-34	lil	wayne	1519	143	23
5.5125100695369675E-34	grilled	cheese	130	525	18
5.634256013915023E-34	you -exclam-	you too -exclam-	2013	368	32
5.782497048294711E-34	post :	thanks for	423	5033	45
6.182054924779586E-34	today -question-	how are	1560	2363	56
6.513861562701986E-34	are u	im	834	11584	85
6.518561672347512E-34	how are you	. you -question-	1261	239	25
6.699752479786805E-34	watching	i love that	6587	840	66
7.040901240935329E-34	father 's	s day	77	80	12
7.078902357116024E-34	up to -question-	chillin	256	557	21
7.340207403588243E-34	i love you -exclam-	love you too	84	308	15
7.975199069066953E-34	blog	thanks for the rt	2142	701	40
8.22892220582568E-34	how are	i 'm fine thanks	1760	21	15
8.22892220582568E-34	how are	m fine thanks	1760	21	15
8.370317016754613E-34	potter and	harry potter	89	425	16
8.492541681891315E-34	-exclam- how	good ,	1398	778	36
8.519441464493763E-34	my nose	your nose	122	52	12
8.589902879863207E-34	r u	you -question-	1250	4875	69
8.800866522173913E-34	ng	sa	213	542	20
8.993804556814262E-34	of july -exclam-	happy 4th	71	152	13
9.11669595437604E-34	how are ya	you -question-	93	4875	27
9.146807896027567E-34	watching	i love	6587	7608	218
9.299559188553392E-34	a movie	what movie	433	88	16
9.527342985600128E-34	tonight	what time	7378	917	72
9.543317451126396E-34	miss my	i miss you too	321	161	17
9.65025946748501E-34	u been	ve been	363	1290	28
9.803162113751668E-34	cream -dots-	ice cream	54	511	15
9.837235562756828E-34	my way to	have fun	634	2044	38
1.0289953542898789E-33	you *	smiles	212	429	19
1.0389051639141719E-33	followfriday	the -emo-	174	1267	23
1.0396396702902829E-33	is it	, it	3337	2918	86
1.0798615696013453E-33	love you	you too -exclam-	1453	368	29
1.087978189912849E-33	ca n't wait	n't wait to	1470	880	38
1.1028525581460658E-33	how you been	been good	60	107	12
1.1206373593270806E-33	today -question-	how are you	1560	1793	50
1.1570258202632436E-33	watching	that movie is	6587	82	28
1.1888379552566299E-33	week	shark	3605	93	25
1.1903636616169173E-33	eating	food	2057	1507	52
1.191568466278833E-33	-exclam- how	great	1398	7545	89
1.2078173997115153E-33	you today	how are you -question-	214	846	22
1.2265829209112031E-33	have you	nope	1461	1359	44
1.2489438335133407E-33	ice	cream -question-	1333	45	17
1.2511023647396622E-33	to bed	night night	1515	102	21
1.390278921894988E-33	need help : -emo-	" at	8	49	8
1.390278921894988E-33	help : -emo-	" at	8	49	8
1.4031389692542428E-33	how are you	about you -question-	1261	286	26
1.403229603482864E-33	heading	fun	1274	5799	75
1.4321809827026561E-33	my sister	your sister	480	82	16
1.4420297492987568E-33	veronica mars	tweet-extravaganza -exclam-	15	7	7
1.4420297492987568E-33	veronica mars	mars tweet-extravaganza -exclam-	15	7	7
1.4420297492987568E-33	veronica mars	tweet-extravaganza	15	7	7
1.4420297492987568E-33	veronica mars	a movie already	15	7	7
1.4420297492987568E-33	veronica mars	movie already -exclam- -emo-	15	7	7
1.4420297492987568E-33	veronica mars	tweet-extravaganza -exclam- vm needs	15	7	7
1.4420297492987568E-33	veronica mars	-exclam- vm	15	7	7
1.4420297492987568E-33	veronica mars	vm needs	15	7	7
1.4420297492987568E-33	veronica mars	a movie already -exclam-	15	7	7
1.4420297492987568E-33	veronica mars	needs a movie	15	7	7
1.4420297492987568E-33	veronica mars	-exclam- vm needs a	15	7	7
1.4420297492987568E-33	veronica mars	needs a movie already	15	7	7
1.4420297492987568E-33	veronica mars	movie already -exclam-	15	7	7
1.4420297492987568E-33	veronica mars	vm needs a movie	15	7	7
1.4420297492987568E-33	veronica mars	mars tweet-extravaganza -exclam- vm	15	7	7
1.4420297492987568E-33	veronica mars	tweet-extravaganza -exclam- vm	15	7	7
1.4420297492987568E-33	veronica mars	vm needs a	15	7	7
1.4420297492987568E-33	veronica mars	-exclam- vm needs	15	7	7
1.4420297492987568E-33	veronica mars	mars tweet-extravaganza	15	7	7
1.4458603685961093E-33	birthday ,	happy birthday	96	1008	19
1.5042217968983417E-33	thanks for	your welcome	1663	137	23
1.5157884953906859E-33	ca	n't	7101	37533	726
1.5209060098730153E-33	ang	nga	222	238	17
1.5343832525916344E-33	blog	for the	2142	8195	116
1.5479504336686964E-33	been -question-	i been	352	335	20
1.6042430987907123E-33	night	nite	7719	566	59
1.6116046817776273E-33	i love	love u	6643	437	50
1.6262769730567802E-33	are you	. i 'm	6415	2351	107
1.6527523992054443E-33	flu	get well	609	244	21
1.749253089666854E-33	why do	because you	1224	498	30
1.8216404656795194E-33	# australiawantsjonas -emo- #	-emo- # australiawantsjonas	17	17	8
1.8216404656795194E-33	australiawantsjonas -emo- #	-emo- # australiawantsjonas	17	17	8
1.8216404656795194E-33	australiawantsjonas -emo- #	# australiawantsjonas	17	17	8
1.8838215855799017E-33	how are	good how	1760	74	20
1.9605822444161776E-33	hair	short	2306	574	38
2.0273314022760114E-33	today	good luck	13159	1950	143
2.0292742612734985E-33	leaving	safe	946	982	34
2.141020439110235E-33	miss you -exclam-	miss you too -exclam-	79	85	12
2.157764663861681E-33	ipod	touch	662	470	25
2.2428509578082553E-33	ka	pa	312	385	20
2.2619638018844074E-33	video	youtube	3159	644	44
2.2805267294321478E-33	playing	game	2228	1772	57
2.3473655215365208E-33	you live	i live	146	374	17
2.350488356566143E-33	-exclam- how are	. how are	354	340	20
2.3887152740448645E-33	hungry	food	1175	1507	42
2.402986988220588E-33	. how are	m good	235	515	20
2.4820905658494117E-33	iphone	3gs -question-	2666	43	19
2.493051199529792E-33	how was	great	753	7545	66
2.497841034576994E-33	pattinson	robert	65	105	12
2.5357798873522997E-33	officially	congrats	801	1789	39
2.729949804587852E-33	iphone	tweetdeck	2666	392	35
2.7444100563875483E-33	sleep	goodnight	4135	410	41
3.110803737078623E-33	grins	smiles	130	429	17
3.1650780204185276E-33	raining	the rain	521	293	21
3.169033224297434E-33	how are you -question-	good .	563	1681	34
3.2789077247784E-33	# australiawantsjonas -emo-	-emo- # australiawantsjonas	18	17	8
3.2789077247784E-33	australiawantsjonas -emo-	# australiawantsjonas	18	17	8
3.2789077247784E-33	australiawantsjonas -emo-	-emo- # australiawantsjonas	18	17	8
3.290804770898243E-33	watching -emo-	movie	253	2827	31
3.3128774180745685E-33	dreams	night	539	5138	49
3.392486809289715E-33	harry	see it	1391	1036	39
3.440305390360656E-33	my way	have fun	1061	2044	45
3.638565143125699E-33	miss you -exclam-	you too	79	1314	19
3.658174834969241E-33	blog post	thanks for	551	5033	49
3.736599327570155E-33	are you	yes i	6415	948	68
3.749872652566107E-33	how r	how are you	352	1793	30
3.753523641069607E-33	need help : -emo-	your question	8	55	8
3.753523641069607E-33	help : -emo-	your question	8	55	8
4.221637195540158E-33	your phone	my phone	153	495	18
4.3319274757592225E-33	shark	week	167	2688	27
4.345704405216277E-33	did you get	i did	418	3269	38
4.358267496763779E-33	are you -question-	. how are	946	340	25
4.498572394002873E-33	birthday wishes -exclam-	happy	26	4223	18
4.6877329548946543E-33	lambert	adam	80	242	14
4.772698517781702E-33	how are you	am good	1261	83	19
4.9895618590864195E-33	movie	watched	3290	929	51
5.345516260805716E-33	green	in iran	998	34	15
5.5258327126893296E-33	: i	ooc	933	250	23
5.993814332861437E-33	my bday	happy birthday	194	1008	22
6.53302305449237E-33	getting ready	have fun	951	2044	43
6.914328580941612E-33	snow	leopard	225	35	12
6.937856491409458E-33	how have you been	been good	69	107	12
6.950223017655979E-33	beach .	the beach	140	416	17
6.96723378340272E-33	my car	your car	394	108	16
7.033876221594788E-33	you -question-	fine thanks	3094	59	21
7.055756065657801E-33	today	congrats	13159	1789	135
7.165216125400306E-33	how are you -question-	. how are you	563	282	21
7.561082449524943E-33	to watch	watching	1553	2829	59
7.690275440123875E-33	followers	spam accounts	2219	20	15
7.771446226284532E-33	las	vegas	155	505	18
7.773371840202496E-33	blackberry	twitterberry	689	65	16
7.8192778009134E-33	how are you	m good thanks	1261	39	16
7.8192778009134E-33	how are you	i 'm good thanks	1261	39	16
7.860138243276329E-33	going to bed	dreams	427	549	23
7.928609938070638E-33	pizza	hut	933	50	16
8.048080973916386E-33	hangover	movie	489	2827	38
8.625054699247269E-33	cream .	ice	94	865	18
8.841861122090743E-33	nice to	to meet you	365	161	17
8.87086893998075E-33	miss you -exclam-	i miss you too	79	161	13
8.9310747222057E-33	tomorrow	have fun	5757	2044	93
9.604593301504776E-33	i miss you -exclam-	miss you too -exclam-	49	85	11
1.0000741443204798E-32	cream -dots-	ice	54	865	16
1.0142852348756013E-32	friday	for the ff	2501	184	27
1.0394758867776287E-32	harry potter	see it	1225	1036	37
1.072011310194272E-32	nice to	to meet	365	442	21
1.0948106591588623E-32	for the	welcome -exclam-	7891	231	41
1.1070603600583639E-32	have you been	ve been	261	1290	25
1.1204279966561735E-32	watched	that movie	1111	724	32
1.153609910355895E-32	veronica mars	movie already	15	8	7
1.180991079484371E-32	happy	b-day	4650	119	28
1.1881419119087752E-32	i lost	followers	337	994	25
1.1967964781049495E-32	missed you	you too	186	1314	23
1.251172611648048E-32	need help :	" at	9	49	8
1.2957006672455755E-32	s up	you -question-	777	4875	55
1.3058631559964903E-32	thank you	you 're welcome .	2068	70	20
1.3058631559964903E-32	thank you	re welcome .	2068	70	20
1.3321903189512962E-32	4th of july -exclam-	happy 4th	52	152	12
1.361371182479995E-32	ang	mo	222	595	20
1.3908024821599648E-32	how are you	how about	1261	856	35
1.3945809340842047E-32	drive	driving	950	539	28
1.4001629597755649E-32	u up	chillin	294	557	21
1.417750071031227E-32	got ta go	bye	232	345	18
1.4365445348798812E-32	you been	ve	479	6003	49
1.48504525784014E-32	is it too	never too	66	65	11
1.4940445690964192E-32	good morning	you too	1811	1314	46
1.4991350360066662E-32	love you -exclam-	you too	157	1314	22
1.5008903035042382E-32	, how are	i 'm good	204	513	19
1.5715526022347892E-32	lunch	food	2172	1507	52
1.5725654743126643E-32	, how are	m	204	26562	61
1.5767719200777404E-32	how are	how about you -question-	1760	143	23
1.6018806845136734E-32	how are	thanks ,	1760	514	33
1.6068827969362425E-32	i miss you	too -exclam-	378	3764	38
1.612216254282776E-32	going to bed	sweet dreams	427	245	19
1.6172224400111138E-32	, how are	m good	204	515	19
1.6438632661172167E-32	r u -question-	i 'm	227	26421	64
1.7032645139506492E-32	you today -question-	how are you	141	1793	23
1.7136037126115457E-32	wat u	chillin	362	557	22
1.7257922140965467E-32	have you been -question-	been good	74	107	12
1.835066320409818E-32	this song	that song	304	804	23
1.8616477578526736E-32	voodoo child	is a voodoo	6	6	6
1.8616477578526736E-32	a voodoo child	is a voodoo	6	6	6
1.8863021573465677E-32	, how are you	i 'm good	160	513	18
1.912687389897934E-32	birthday wishes -exclam-	happy birthday	26	1008	14
1.9562480182112816E-32	how are you -question-	fine thanks	563	59	15
2.024615168182551E-32	, how are you	m good	160	515	18
2.068852751723078E-32	happy	day to	4650	136	29
2.1061532336337373E-32	ta go	bye	237	345	18
2.1984292058586708E-32	sa	naman	420	253	19
2.219834569680338E-32	r u -question-	m	227	26562	64
2.2796484489072638E-32	to me	birthday	2111	1956	57
2.361567107905503E-32	s birthday	happy	149	4223	29
2.3878346161699864E-32	how have	good	121	23545	46
2.4652002760421817E-32	rt	much for	15729	377	65
2.4791829360631477E-32	how was	urs	753	182	20
2.513166332480174E-32	i was	you were	5334	2096	90
2.6591069704595486E-32	how have	i 've been	121	914	19
2.7577636669505727E-32	morning	are you -question-	6106	1450	80
2.879338278798221E-32	birthday to	birthday -exclam-	222	375	18
2.934435964590596E-32	with me	with you	1466	2049	50
3.048730113311145E-32	how are	good -dots-	1760	630	35
3.0960673741424775E-32	good morning	how are you -question-	1811	846	39
3.122590527570213E-32	firefox	chrome	259	85	14
3.187665050436E-32	today	good	13159	23545	816
3.3497773387111646E-32	doin	chillin	1208	557	30
3.377928577027615E-32	need help :	your question	9	55	8
3.4650635854201047E-32	woke	sleep	1192	2934	53
3.478162607063523E-32	roads	do n't need	60	239	13
3.612659198242903E-32	ko	lang	339	321	19
3.8864425658317256E-32	roads	we do n't	60	241	13
3.889598913664678E-32	vista	windows	85	263	14
4.0243492944686747E-32	how have you	been good	79	107	12
4.074970493102072E-32	all the birthday wishes	happy	23	4223	17
4.228111416187238E-32	starbucks	coffee	493	949	27
4.357730042442347E-32	chuck	norris does	339	11	10
4.390848194062824E-32	miss u	miss you too	185	253	16
4.66499139031273E-32	potter	see it	1278	1036	37
4.8132689166011804E-32	hugs *	* hugs	143	331	16
4.8657964504537133E-32	4th of	july	303	573	21
4.9010763786338987E-32	how are	good -exclam-	1760	1311	45
4.936168177686762E-32	# followfriday	for the -emo-	128	512	17
5.121878861029387E-32	ko	naman	339	253	18
5.146762227857096E-32	how are	am fine	1760	33	16
5.490085979840083E-32	hero	guitar	326	264	18
5.562147349845958E-32	, how are you	m	160	26562	54
5.747216878367406E-32	what 's good	chillin	314	557	21
5.858636924564629E-32	ff	thanks for	417	5033	43
5.920210771932049E-32	how are u	i 'm good	170	513	18
6.196729006564367E-32	bed	night -exclam-	3393	611	43
6.220277091066444E-32	ff	for the -emo-	417	512	22
6.272852341242101E-32	moon	station	573	248	20
6.307620384305389E-32	shit	nigga	4920	1589	75
6.362764813892177E-32	is it just me	just you	177	83	13
6.721186978528896E-32	how are you	and you	1261	1630	43
6.837456564180574E-32	to me -exclam-	happy birthday	258	1008	23
7.27089418259832E-32	my birthday .	happy birthday	70	1008	17
7.315673343419273E-32	blog post :	rt	325	4600	38
7.459383790751715E-32	apa	jadi	253	191	16
7.518926309158825E-32	to the	fun	7266	5799	191
7.566500668399792E-32	happy	friendship day	4650	27	18
7.60338993768833E-32	tattoo	getting -question-	440	80	15
7.616104626125517E-32	follow	shout	3580	478	40
7.818738381265691E-32	it 's my birthday	birthday -exclam-	64	375	14
7.999080769032578E-32	for the birthday	happy	35	4223	19
8.103759564705795E-32	help :	answered your	25	17	8
8.103759564705795E-32	help :	question -emo-	25	17	8
8.267709474069988E-32	watching	channel	6587	388	46
8.29937612338441E-32	]	[	567	254	20
8.591282072985321E-32	it just me	just you	181	83	13
8.652084308348515E-32	how are	doing well	1760	107	21
8.800226648240606E-32	ako	mo	243	595	20
8.86858157413881E-32	morning	hope	6106	7495	201
9.091856895006721E-32	airport	have a safe flight	755	92	17
9.156642103473542E-32	i am	you are	8091	5728	203
9.18791660056949E-32	apa	itu	253	264	17
9.228740423827688E-32	apartment hunting	new cazoodle apartment search	16	9	7
9.228740423827688E-32	apartment hunting	new cazoodle apartment	16	9	7
9.228740423827688E-32	apartment hunting	new cazoodle	16	9	7
9.228740423827688E-32	apartment hunting	apartment search at	16	9	7
9.228740423827688E-32	apartment hunting	cazoodle	16	9	7
9.228740423827688E-32	apartment hunting	try the new cazoodle	16	9	7
9.228740423827688E-32	apartment hunting	search at	16	9	7
9.228740423827688E-32	apartment hunting	should try the new	16	9	7
9.228740423827688E-32	apartment hunting	the new cazoodle apartment	16	9	7
9.228740423827688E-32	apartment hunting	apartment search	16	9	7
9.228740423827688E-32	apartment hunting	the new cazoodle	16	9	7
9.228740423827688E-32	apartment hunting	cazoodle apartment search at	16	9	7
9.228740423827688E-32	apartment hunting	cazoodle apartment	16	9	7
9.228740423827688E-32	apartment hunting	cazoodle apartment search	16	9	7
9.260874041575112E-32	listening to	that song	2113	804	40
9.315740326508031E-32	how are	i 'm ok	1760	71	19
9.473698941671411E-32	off to	good luck	2362	1950	59
9.836721283821439E-32	to read	book	435	1268	28
9.95928522472929E-32	s my birthday	birthday -exclam-	65	375	14
1.009414165708441E-31	how is	you -question-	707	4875	52
1.0159330226499796E-31	are you today	how are you -question-	139	846	19
1.0219241682802127E-31	book	read it	1502	325	27
1.0242163503026644E-31	doin	u -question-	1208	1507	41
1.0330415389890604E-31	how was	my day	753	349	23
1.0430422597169816E-31	first day	good luck	253	1950	27
1.0480221688742213E-31	cup of	tea	190	611	19
1.0853253819012055E-31	you been -question-	ve been	144	1290	21
1.0861926680922754E-31	doing -question-	how are you	699	1793	36
1.0913539362442211E-31	twitter	welcome to	9747	755	72
1.1431765522934367E-31	how are u	you -question-	170	4875	31
1.1438854585769657E-31	watching	tv	6587	1041	70
1.1735987813241795E-31	good night	sweet	645	2118	37
1.1774921039199566E-31	interview	good	870	23545	121
1.2117844587858E-31	-exclam- rt	the rt	1032	1019	34
1.2382288814674328E-31	camera	canon	468	54	14
1.2480421375107018E-31	you been	good	479	23545	87
1.2607895671621535E-31	blog	thanks for the	2142	3077	69
1.2619361262669938E-31	how are	m ok	1760	72	19
1.2689403504154961E-31	city suit	chopper city	13	11	7
1.2743410710462784E-31	diet	coke	284	176	16
1.28027543034884E-31	at me	at you	507	435	22
1.303153431969323E-31	voodoo child	a voodoo	6	7	6
1.319128694105657E-31	enemies	johnny	171	140	14
1.3429282767909465E-31	is she	she is	216	851	21
1.3548555098508195E-31	you today -question-	how are you -question-	141	846	19
1.3610027540650435E-31	good	how are you	19578	1793	168
1.3850507875197903E-31	what 's up -question-	you -question-	171	4875	31
1.4646619144515191E-31	song	listen	3174	888	48
1.4763881132096962E-31	nice to	meet you	365	249	18
1.4789119433632492E-31	s up -question-	you -question-	189	4875	32
1.5316247103298138E-31	4th of	of july	303	167	16
1.6090048275307585E-31	morning	early	6106	1451	79
1.6413712566960666E-31	-dots- how	u -question-	985	1507	38
1.6478511603115153E-31	ff	follow	417	2826	35
1.6708791464964531E-31	how are	good . how	1760	58	18
1.676145978988962E-31	iphone	blackberry	2666	303	31
1.6938642143277822E-31	did you	no ,	2913	1538	58
1.7146602266531476E-31	chuck norris	norris is	203	16	10
1.716367161674003E-31	good	today	19578	6308	398
1.7899439111271522E-31	morning	. how	6106	1763	87
1.7904465636195867E-31	you today -question-	how are	141	2363	24
1.8510010496600678E-31	you *	back *	212	116	14
1.859442528590489E-31	dia	feliz	159	35	11
1.9678935265882776E-31	# ff	for the	89	8195	29
1.9982077934248215E-31	i ca	ca n't	2554	6255	107
2.0782684449017848E-31	tweetdeck	seesmic	525	34	13
2.0804755035614315E-31	-emo- you	back *	822	116	18
2.088259761081376E-31	ko	ba	339	273	18
2.1175206980199563E-31	headache	feel better	517	723	25
2.1459578871707214E-31	was your	was good	310	385	19
2.1668956442496746E-31	r u	i am	1250	6586	76
2.177177114268909E-31	are you -question-	fine thanks	946	59	16
2.187829607835228E-31	have you	no i have	1461	69	18
2.2115602374839063E-31	thanks for the	welcome -exclam-	813	231	21
2.232341194510841E-31	sleep	sweet dreams	4135	245	33
2.332565145920705E-31	how are you	yourself -question-	1261	219	23
2.342564860244085E-31	potter and the	harry	69	557	15
2.391114759517744E-31	: i	ooc :	933	203	21
2.4017679443284143E-31	are you today -question-	how are you	110	1793	21
2.419445074298321E-31	. how are	i 'm good	235	513	19
2.4687860388994085E-31	reading	that book	1473	87	19
2.4808210200129232E-31	love you .	you too	120	1314	20
2.4825867558164934E-31	transformers	movie	709	2827	42
2.51890634852524E-31	re	m	6778	26562	527
2.6247579383177113E-31	for me	for you	2344	3212	73
2.676482490940396E-31	good morning	-exclam- how are	1811	447	31
2.711844777733908E-31	doin	you -question-	1208	4875	65
2.718752457804048E-31	txt	text	142	871	19
2.7361903525070646E-31	m	rt	29033	4600	80
2.802827582353319E-31	friday	the ff	2501	207	27
2.95240736892267E-31	how r	fine	352	1640	28
2.9993313119833455E-31	tour	warped	1060	148	20
3.0168041825298125E-31	xbox	ps3	298	126	15
3.0454293515344333E-31	feliz dia	dia do	13	12	7
3.2153051769173042E-31	true blood	love true	413	11	10
3.218718699356147E-31	100	ufc	813	92	17
3.279128444021642E-31	ang	ako	222	324	17
3.354653346149083E-31	feeling	hope you feel	2382	247	28
3.437540949345848E-31	n't	me neither	31254	122	50
3.4968075238205437E-31	i wan	na	1756	9691	110
3.5523316652708647E-31	pa	sa	285	542	20
3.6262613921290348E-31	what 's	nothing much	4106	149	28
3.6692243159477144E-31	hey	-exclam- how	5300	1911	84
3.713038912275434E-31	song	hear it	3174	350	34
3.7413798913617224E-31	:	0	32150	9929	829
3.8222673358662962E-31	u was	i was	197	7608	37
3.8404729767574145E-31	happy birthday to	birthday -exclam-	194	375	17
3.8911069003930637E-31	my new	get -question-	1840	318	28
4.1355156288020595E-31	movies	what movie	866	88	17
4.137676574216308E-31	-exclam- rt	for the rt	1032	964	33
4.440826780013357E-31	doing -question-	how are	699	2363	39
4.548924344132888E-31	hop	hip	204	128	14
4.562509255841011E-31	, how are you	i 'm	160	26421	53
4.5665088859839205E-31	that was	it was	1579	5694	79
4.571169110558347E-31	-exclam- how	fine	1398	1640	44
4.630946067115108E-31	day	morning	13084	3181	187
4.673594706000681E-31	leopard	snow	109	155	13
4.763271778214111E-31	early to	too early	147	115	13
4.842759123305477E-31	re	i 'm	6778	26421	524
4.905216347021134E-31	ubertwitter	twitterberry	160	65	12
5.037779913049161E-31	i feel	feel like	2637	676	40
5.1377246268176055E-31	new blog post	thanks for	387	5033	41
5.212613718605997E-31	a voodoo	voodoo child	8	6	6
5.229688063859672E-31	yu	im	812	11584	80
5.3644743307928345E-31	how are	m good .	1760	77	19
5.371250826156983E-31	the airport	have a	415	6790	47
5.465078924971578E-31	sick .	feel better	270	723	21
5.736733046588051E-31	" at	answered your question -emo-	100	8	8
5.7465383892195695E-31	died	sorry to hear	694	341	22
5.813311488464563E-31	cute	adorable	1789	373	29
5.836238568534612E-31	thank you	re	2068	12182	137
5.853638335538441E-31	happy birthday	birthday -exclam-	755	375	23
5.869257140570008E-31	flu	get well soon	609	208	19
5.976467798522929E-31	movie	seen it	3290	406	36
5.9986027215175475E-31	good morning	great day	1811	369	29
6.023506466221559E-31	too early	early for	212	82	13
6.121730288193712E-31	hey	how r u	5300	370	41
6.28118915071231E-31	, how	how are you	1065	1793	41
6.323872606610937E-31	anniversary	congrats	257	1789	26
6.346223747564643E-31	: new blog	rt	51	4600	21
6.436124869279407E-31	great	glad	6020	2509	103
6.616227264280133E-31	how do	click	934	306	23
6.639965709992345E-31	youtube	videos	946	356	24
6.760446558991049E-31	need help : -emo-	answered	8	102	8
6.760446558991049E-31	help : -emo-	answered	8	102	8
6.9219822438006065E-31	today -question-	how are you -question-	1560	846	36
6.957956272872991E-31	social media	thanks for the rt	229	701	20
7.059364802676189E-31	have you	i 've	1461	3950	64
7.121431446225576E-31	happy	4th to	4650	24	17
7.283428173977563E-31	wit	yall	2180	881	41
7.421492941170997E-31	google voice	an invite	153	70	12
8.125296178156986E-31	sick	feel better -exclam-	1698	122	21
8.239180150395972E-31	to bed	night -exclam-	1515	611	32
8.836700143829384E-31	i 'm	rt	28858	4600	80
9.200678334683058E-31	, how are	i 'm	204	26421	59
9.2758740207853E-31	good morning	a great day	1811	333	28
9.322147724852886E-31	nick	jonas	499	399	21
9.484346264278308E-31	today	hope	13159	7495	336
9.602194055620399E-31	i miss	miss you more	1739	29	15
9.664114589833842E-31	roads	n't need	60	307	13
9.707563147483485E-31	morning	good day	6106	417	45
9.952459787892766E-31	sleep	wake	4135	573	44
1.0004002163617208E-30	social	for the rt	546	964	27
1.0148637177824241E-30	did u	no i	926	906	31
1.0210607608744456E-30	* smiles *	you *	271	283	17
1.0303208603758911E-30	tweetdeck	tweetie	525	148	17
1.0382089871240453E-30	day -question-	yours -question-	552	295	20
1.0505261189080414E-30	mexican	food	231	1507	24
1.0551673688830955E-30	party	fun	2620	5799	103
1.077940985351164E-30	s my birthday -exclam-	happy	17	4223	15
1.168773513876277E-30	you *	-emo- you	212	779	20
1.1740149832713927E-30	good	morning to you too	19578	48	29
1.2234577538848297E-30	are you today -question-	how are	110	2363	22
1.2294205731658194E-30	the game .	lost the	54	59	10
1.229882997742166E-30	i love you .	love you too	92	308	14
1.3020122339273974E-30	i missed you	missed you too	81	40	10
1.3361162889216024E-30	a great	great day	1651	369	28
1.3573355377299535E-30	how u	been good	551	107	16
1.3754945127112E-30	sims	3	194	2480	26
1.4268692678545215E-30	luck -exclam-	good	244	23545	61
1.5188579952111514E-30	good morning	morning .	1811	381	29
1.542412997242735E-30	grins	smiles *	130	321	15
1.6155293287065047E-30	public enemies	johnny	132	140	13
1.6354724457743306E-30	how are	i 'm good thanks	1760	39	16
1.6354724457743306E-30	how are	m good thanks	1760	39	16
1.6529679134532E-30	funny	hilarious	2581	664	39
1.6640500357234972E-30	blood .	true blood	97	192	13
1.667010625090738E-30	i love	you too -exclam-	6643	368	44
1.6979090285345127E-30	luck .	good luck	111	1950	21
1.7002664701684227E-30	, how	how are	1065	2363	45
1.7239540300862835E-30	how are you -question-	, how	563	1221	29
1.7360816090324142E-30	sick	i hope you feel	1698	84	19
1.7437007696596848E-30	ryan	reynolds	366	34	12
1.7708054395407566E-30	follow friday	for the -emo-	485	512	22
1.8871339552488526E-30	iphone	the 3gs	2666	46	18
1.9249017453537186E-30	died	sorry to	694	429	23
2.022889280346512E-30	hair is	your hair	150	282	15
2.0380159200318238E-30	love you -exclam-	i love you too	157	184	14
2.0398575716751997E-30	* smiles	you *	282	283	17
2.1511019581004338E-30	going to bed	good night	427	587	22
2.3147109225248244E-30	lang	sa	196	542	18
2.3167534170565963E-30	-exclam- i miss	i miss you too	118	161	13
2.359041697735825E-30	google chrome	os	77	152	12
2.4441078380310938E-30	ready	fun	3432	5799	119
2.4860653520502096E-30	how are	good just	1760	66	18
2.499042566894306E-30	how are you	great -exclam-	1261	915	34
2.5092018808533573E-30	are you	. i	6415	14889	327
2.5322281736330024E-30	flight	have a	679	6790	57
2.552360783139758E-30	media	for the rt	495	964	26
2.5540963316119084E-30	-exclam- how	doing great	1398	81	18
2.5749226340922567E-30	you -question-	good ,	3094	778	44
2.623982202764052E-30	you like	i like	864	3126	46
2.6987713854074522E-30	lagi	di	260	811	21
2.7751679382124825E-30	woke	up at	1192	403	26
2.8532575390398103E-30	nice to meet	you too	67	1314	17
2.8644394621043137E-30	i do	you do	6212	3023	115
2.881179386410527E-30	vou	boa	77	87	11
2.9374324842475843E-30	how are you	pretty good	1261	494	28
2.992747088760766E-30	flu	well soon	609	226	19
3.0693345574533996E-30	tonight	show	7378	3621	141
3.161526323281135E-30	to me	happy birthday	2111	1008	42
3.171369108137025E-30	why do i	because you	345	498	20
3.4049342268913054E-30	miss my	you too	321	1314	25
3.446739500032603E-30	veronica	vm needs a movie	39	7	7
3.446739500032603E-30	veronica	-exclam- vm	39	7	7
3.446739500032603E-30	veronica	movie already -exclam- -emo-	39	7	7
3.446739500032603E-30	veronica	vm needs a	39	7	7
3.446739500032603E-30	veronica	needs a movie	39	7	7
3.446739500032603E-30	veronica	-exclam- vm needs	39	7	7
3.446739500032603E-30	veronica	-exclam- vm needs a	39	7	7
3.446739500032603E-30	veronica	vm needs	39	7	7
3.446739500032603E-30	veronica	tweet-extravaganza	39	7	7
3.446739500032603E-30	veronica	tweet-extravaganza -exclam- vm	39	7	7
3.446739500032603E-30	veronica	movie already -exclam-	39	7	7
3.446739500032603E-30	veronica	needs a movie already	39	7	7
3.446739500032603E-30	veronica	mars tweet-extravaganza -exclam- vm	39	7	7
3.446739500032603E-30	veronica	tweet-extravaganza -exclam- vm needs	39	7	7
3.446739500032603E-30	veronica	a movie already -exclam-	39	7	7
3.446739500032603E-30	veronica	mars tweet-extravaganza	39	7	7
3.446739500032603E-30	veronica	a movie already	39	7	7
3.446739500032603E-30	veronica	mars tweet-extravaganza -exclam-	39	7	7
3.446739500032603E-30	veronica	tweet-extravaganza -exclam-	39	7	7
3.4640716712712676E-30	up to	you -question-	1436	4875	69
3.533585455528728E-30	17 again	zac	31	52	9
3.5718349680514136E-30	it just	just you	545	83	15
3.5924403469248344E-30	did you	did n't	2913	4460	94
3.65773114559943E-30	you doing -question-	you -question-	249	4875	34
3.735902849396423E-30	are ya	you -question-	154	4875	29
3.7828911836957776E-30	iphone	the 3g	2666	23	15
3.8025144988385004E-30	how was	it was great	753	113	17
3.837664947698213E-30	jackson	cnn	1708	107	20
4.022877407511975E-30	coffee	morning	1680	3181	61
4.036696189341421E-30	read	books	2167	410	31
4.052422502904444E-30	everyone -exclam-	morning	516	3181	38
4.070366624179553E-30	fever	get well soon	212	208	15
4.221391587626289E-30	i miss	u too	1739	247	25
4.2487978349494554E-30	what 's	you -question-	4106	4875	119
4.35422157670589E-30	social	the rt	546	1019	27
4.3987946581675694E-30	city suit	chopper	13	16	7
4.411106150207487E-30	how are you	i 'm fine thanks	1261	21	13
4.411106150207487E-30	how are you	m fine thanks	1261	21	13
4.452730874171277E-30	fox is	megan fox	40	91	10
4.465461482758897E-30	what time	11	568	456	22
4.612146523683815E-30	how are you	how about you -question-	1261	143	20
4.670961707171698E-30	happy	you -exclam-	4650	4501	122
4.761827102520527E-30	r u	good	1250	23545	147
4.825281617238265E-30	new phone	what phone	199	37	11
4.8938990205828244E-30	wat	idk	1937	1487	47
5.018706712503017E-30	watchin	movie	717	2827	41
5.038656517966247E-30	ca n't	n't wait	6883	1753	90
5.045503126674998E-30	. i miss	i miss you too	191	161	14
5.06705357356078E-30	happy 4th	4th to you	208	20	10
5.0878079881013475E-30	love u	love you	252	2269	27
5.112372250471505E-30	my birthday .	happy	70	4223	22
5.162333655566444E-30	" at	answered your question	100	9	8
5.6468175922163196E-30	tomorrow	fun	5757	5799	161
5.6833763734903285E-30	today -question-	m good	1560	515	30
5.712294320076095E-30	s day	father 's	136	53	11
5.79735754811762E-30	nap	sleep	740	2934	42
5.83709220772887E-30	wish me luck -exclam-	good luck -exclam-	119	384	15
6.083527666323966E-30	need help :	answered	9	102	8
6.247718439092519E-30	my hair	your hair -question-	876	40	14
6.480014998355004E-30	play	game	2297	1772	54
6.483149255847185E-30	apa	ga	253	565	19
6.580934835539746E-30	happy	thank you -exclam-	4650	632	47
6.740905467962295E-30	how r u -question-	im good	151	303	15
6.859283985669762E-30	you -question-	good .	3094	1681	60
6.993543518106639E-30	to sleep	night	1338	5138	68
7.221259384529916E-30	-emo- # followfriday	for the	42	8195	22
7.271053629893448E-30	off to	have a good	2362	808	40
7.349668579703352E-30	moon	s no	573	313	20
7.477883411449066E-30	australiawantsjonas -emo- #	# australiawantsjonas -emo-	17	13	7
7.477883411449066E-30	# australiawantsjonas -emo- #	-emo- # australiawantsjonas -emo-	17	13	7
7.477883411449066E-30	australiawantsjonas -emo- #	-emo- # australiawantsjonas -emo-	17	13	7
7.477883411449066E-30	australiawantsjonas -emo- # australiawantsjonas	-emo- # australiawantsjonas -emo-	17	13	7
7.477883411449066E-30	australiawantsjonas -emo- # australiawantsjonas	# australiawantsjonas -emo-	17	13	7
7.513451469268508E-30	smiles *	you *	304	283	17
7.60590995189232E-30	me luck -exclam-	good luck -exclam-	121	384	15
7.706449004769562E-30	awake	to sleep	947	853	30
7.76516054492002E-30	day	a great	13084	2298	150
8.02616532199343E-30	iced	coffee	155	949	19
8.23338436191423E-30	how are	how r u	1760	370	28
8.28682294991699E-30	ice cream	of ice	798	44	14
8.411698197422342E-30	* hugs	hugs *	135	345	15
8.436274683583602E-30	to work	at work	1613	952	37
8.580750296799019E-30	you from	im from	160	81	12
8.600812645921483E-30	masonmussotoe -emo-	# masonmussotoe	6	11	6
8.600812645921483E-30	# masonmussotoe -emo-	-emo- # masonmussotoe	6	11	6
8.600812645921483E-30	masonmussotoe -emo-	-emo- # masonmussotoe	6	11	6
8.797470196307869E-30	apartment hunting	you should try the	16	14	7
8.835268666434527E-30	post	for the	2014	8195	106
8.8740594611847E-30	do u live	i live in	25	166	10
8.991870340665424E-30	was ur	it was	110	5694	27
9.457757207271387E-30	feeling well	feel better	68	723	15
9.619617228951835E-30	my brother	your brother	392	84	14
9.64823205816112E-30	woke up	up at	1086	403	25
9.869064551779918E-30	miss you	miss u	628	355	21
9.925991455961201E-30	iphone	0	2666	195	26
1.0045519986408421E-29	the only	only one	1141	442	26
1.0123371295658839E-29	jeans	skinny	307	153	15
1.0152301519105941E-29	ca	n't wait	7101	1753	91
1.0330511978837439E-29	green	democracy	998	37	14
1.039781624110961E-29	u -question-	fine	1092	1640	39
1.054242312467726E-29	media	the rt	495	1019	26
1.0731110295383052E-29	. how are you	m good	172	515	17
1.0929937036402464E-29	naman	ko	128	519	16
1.1132766596724499E-29	hope you	thank you	836	3346	46
1.175352605394585E-29	off to	luck	2362	2391	62
1.1754079672259435E-29	is it too	too early	66	115	11
1.2190517330438253E-29	vote for	voted for you	276	30	11
1.2629928106433633E-29	follow friday	for the ff	485	184	17
1.2844159320990484E-29	ready for	have fun	1291	2044	45
1.2997451609295666E-29	yay	congrats	2618	1789	57
1.3056821399024474E-29	phone	blackberry	2773	303	30
1.3347603900917388E-29	rt	much for the	15729	156	42
1.34380951087383E-29	a great	have a	1651	6790	86
1.3660492645066213E-29	google voice	invite -question-	153	51	11
1.3779738302209507E-29	whats	u -question-	2064	1507	48
1.396782204138575E-29	the airport	trip	415	1070	25
1.432406470123322E-29	party	parties	2620	111	22
1.4511092274306688E-29	how was	weekend was	753	33	13
1.4659139340515322E-29	fever	well soon	212	226	15
1.4793968312608046E-29	i missed	missed you too	598	40	13
1.5176283030822003E-29	great	day	6020	7913	201
1.518859666606476E-29	i missed	missed you	598	311	20
1.5243469903692555E-29	how are you -question-	, how are you	563	209	18
1.5342602952988562E-29	need help	answered your question -emo-	149	8	8
1.5409423691263126E-29	happy	day to you	4650	40	19
1.5743764747634684E-29	way to	fun	1977	5799	87
1.5824283506545785E-29	of july	fireworks	419	215	17
1.6495033200598566E-29	apartment hunting	try the new	16	15	7
[truncated: 8,000 more rows]
